# Supplementary material for: The Genome of the Obligate Intracellular Parasite Trachipleistophora hominis: New Insights into Microsporidian Genome Dynamics and Reductive Evolution
Source: PLOS journal article supplement (doi:10.1371/journal.ppat.1002979), 2012-10-25

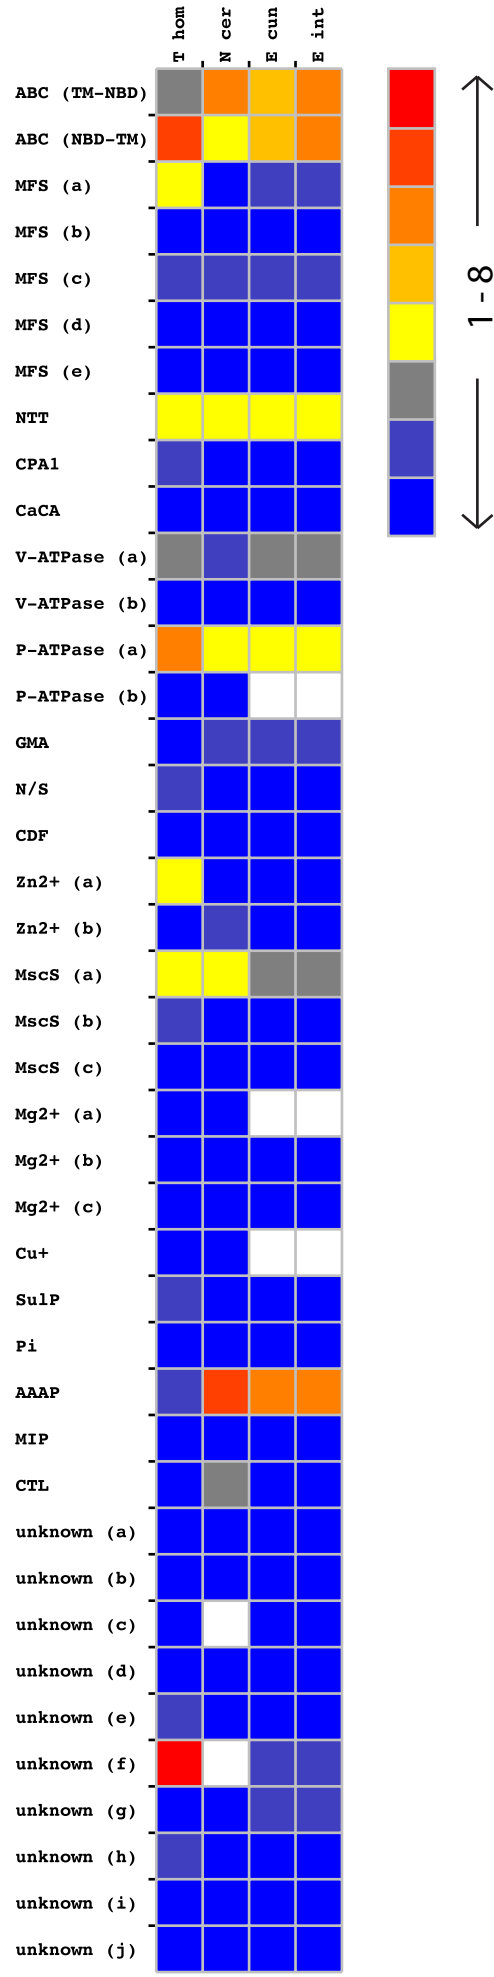

Supplement: S11 (10.1371/journal.ppat.1002979.s011) [file journal.ppat.1002979.s011]
