# Supplementary material for: The Genome of the Obligate Intracellular Parasite Trachipleistophora hominis: New Insights into Microsporidian Genome Dynamics and Reductive Evolution
Source: PLoS Pathog. 2012 Oct 25;8(10):e1002979. doi: 10.1371/journal.ppat.1002979 (PMC3486916; doi:10.1371/journal.ppat.1002979)
Supplement: Table S2 — List of T. hominis ORFs that potentially contain introns. (XLS) [file ppat.1002979.s018.xls]

## Sheet: T2
Supplementary Table 2: T. hominis genes potentially containing introns. 'Classical intron motif' refers to the Microsporidia-conserved motif*, which we detected by searching for the regular expression GTA[AG]GT[ATGC]+?TAA[ATGC]TT[ATGC]{0,3}AG. The 'relaxed' intron motif was discovered following a comparison of intron-encoding genes in E. cuniculi and N. ceranae with T. hominis (Table S3), where a…
	classical intron motif
	intron position
orf number	start	end	gene size	annotation	frameshift (phase 1 or 2)?
64	192	246	312	RNA polymerase	no
159	246	598	639	hypothetical protein	yes
193	487	589	1074	acyltransferases	no
212	160	400	420	Histones H3 and H4	no
227	225	1114	1587	tRNA modification enzyme	yes
247	63	675	798	Protein involved in mRNA turnover and stability	no
360	63	589	744	hypothetical protein	yes
424	391	312	636	putative LRR containing protein	no
495	4081	4402	4701	Vacuolar protein sorting-associated protein	no
575	232	779	918	hypothetical protein	yes
622	339	418	1920	Serine palmitoyltransferase	yes
627	3	30	1161	Ribosomal protein L24E	no
698	1057	1362	2292	putative LRR containing protein	yes
706	1599	1939	2826	putative LRR containing protein	yes
796	315	583	1452	DNA polymerase	yes
843	744	822	936	hypothetical protein	no
845	788	1509	2037	Predicted E3 ubiquitin ligase	yes
864	799	865	900	Protein kinase	no
904	2318	2421	2484	CTP synthase	yes
905	556	1585	2064	Peptidase	no
920	1698	1816	2262	tRNA synthetase	yes
1062	247	1686	1758	protein containing Tetratricopeptide-like helical	yes
1087	63	382	1416	Origin recognition complex, subunit 1, and related proteins	yes
1094	1446	1495	4416	putative LRR containing protein	yes
1096	682	3100	3837	putative LRR containing protein	no
1191	217	425	525	hypothetical protein	yes
1236	356	494	2805	ATP-dependent RNA helicase	no
1236	942	1413			no
1273	1865	2043	2421	hypothetical protein	yes
1275	1521	1689	2052	protein containing Kinesin, motor domain	no
1286	299	495	735	Cis-prenyltransferase	yes
1315	156	341	732	protein containing Zinc finger	yes
1450	526	1166	1410	endonuclease	yes
1472	715	1172	1935	hypothetical protein	yes
1500	798	857	1224	hypothetical protein	yes
1595	96	423	315	40s ribosomal protein S26 (similar to RPS26B; RPS26A;)	no
1611	378	821	1698	hypothetical protein	yes
1643	1050	1758	1953	protein containing Ricin B-related lectin	no
1722	1272	1659	1776	hypothetical protein	no
1728	375	1170	2373	Nucleotide excision repair protein RAD16	no
1804	462	561	582	protein containing Bacterial surface antigen (D15)	no
1856	130	220	552	hypothetical protein	no
1858	944	1894	3015	GTP-binding protein AARP2 involved in 40S ribosome biogenesis (similar to BMS1;)	yes
1905	783	1203	2358	protein containing WD40 repeat	no
1953	1362	1464	2028	hypothetical protein	no
1999	535	905	1044	hypothetical protein	yes
2024	387	1315	2187	5'-3' exonuclease	yes
2075	1807	2191	2889	putative LRR containing protein	yes
2117	302	341	585	hypothetical protein	no
2173	1019	1059	1200	26S proteasome	yes
2240	63	1187	3048	Rho guanyl-nucleotide exchange factor activity	yes
2278	558	605	2322	helicase	yes
2297	404	504	972	hypothetical protein	yes
2327	759	1290	1887	histone acetyltransferase	no
2364	72	148	366	Dim1 spliceosomal complex	yes
2381	146	240	831	hypothetical protein	yes
2412	320	501	1122	hypothetical protein	yes
2414	187	215	924	kinase	yes
2439	32	650	726	Glyoxylase	no
2603	690	1275	2946	putative LRR containing protein	no
2646	66	1371	2163	RNA polymerase	no
2676	895	1700	2028	putative LRR containing protein	yes
2690	240	1425	2661	Predicted RNA-binding protein	no
2690	1566	1810			yes
2718	907	1162	3417	putative LRR containing protein	no
2772	885	2485	2850	putative LRR containing protein	yes
2888	681	1274	3273	myosin	yes
2912	2307	2781	2784	protein containing Homeodomain-related, DNA binding	no
3011	295	4026	4866	putative LRR containing protein	yes
3039	949	1348	2826	putative LRR containing protein	no
3100	34	1320	1335	mRNA decay	yes
3118	22	429	474	Predicted nucleic acid binding protein	yes
3123	322	342	660	40S ribosomal protein S23	yes
3177	236	983	1110	hypothetical protein	no
3214	294	1254	4371	RNA helicase	no
3221	1003	1837	2022	trehalase	no
3226	1365	2068	2850	putative LRR containing protein	yes
3230	903	1243	2667	AAA ATPase	yes
3251	173	220	684	predicted membrane protein	yes
3262	148	172	429	DNA binding cold shock protein	no
	relaxed intron motif
	intron position
orf number	start	end	gene size	annotation (based on KOGs and InterPro domains)	frameshift (phase 1 or 2)?
629	3	28	421	Ribosomal protein S17	yes
3301	3	28	181	Ribosomal protein L39	yes
199	3	26	337	Ribosomal protein L44	yes
383	3	234	795	HIT protein (mRNA capping)	no
3300	3	31	286	Ribosomal protein S27	yes
*This motif is based on the introns characterized in Lee, Gill, Scott and Fast (2010) and Cornman, Chen, Schatz, Street, Zhao et al (2009).
