# Supplementary material for: The Genome of the Obligate Intracellular Parasite Trachipleistophora hominis: New Insights into Microsporidian Genome Dynamics and Reductive Evolution
Source: PLoS Pathog. 2012 Oct 25;8(10):e1002979. doi: 10.1371/journal.ppat.1002979 (PMC3486916; doi:10.1371/journal.ppat.1002979)
Supplement: Table S4 — Putative regulatory motifs in T. hominis. The table includes the number of ORFs located downstream of each motif and the annotation for these ORFs. (XLS) [file ppat.1002979.s020.xls]

## Sheet: T4
Supplementary Table 4: Putative regulatory motifs in T. hominis. The motifs include the CCC and TATA motifs depicted in Figure 2 and the 40 potential regulatory motifs listed in Figure S3. The table includes a description of the ORF that are located downstream of these motifs. The number of proteins downstream of each motif, including ORF without functional annotation, are given in brackets.
orf	ccc (977)	tata (194)	1 (256)	2 (274)	3 (379)	4 (149)	5 (139)	6 (57)	7 (208)	8 (62)	9 (25)	10 (75)	11 (53)	12 (64)	13 (50)	14 (57)	15 (29)	16 (52)	17 (56)	18 (48)	19 (76)	20 (29)	21 (27)	22 (18)	23 (15)	24 (158)	25 (93)	26 (15)	27 (39)	28 (25)	29 (10)	30 (21)	31 (9)	32 (10)	33 (7)	34 (9)	35 (12)	36 (7)	37 (8)	38 (15)	39 (5)	40 (7)	ORF annotation
orf_10	x		x		x								x																														Valyl-tRNA synthetase (similar to VAS1;)
orf_100		x																																									hypothetical protein
orf_1000	x																																										cytidylate kinase
orf_1001	x																																										Protein geranylgeranyltransferase type II, beta subunit (similar to BET2;)
orf_1003	x																									x																	26S proteasome regulatory complex, subunit RPN8/PSMD7 (similar to RPN8;)
orf_1004	x																																										RNA polymerase II transcription initiation/nucleotide excision repair factor TFIIH, subunit TFB2 (similar to TFB2;)
orf_101	x		x						x									x								x																	Uncharacterized conserved protein (similar to PTH2;)
orf_1010	x																																										40S ribosomal protein SA (P40)/Laminin receptor 1 (similar to RPS0B; RPS0A;)
orf_1011					x								x			x			x																								Glycosyltransferase (similar to ALG2;)
orf_1017	x				x														x																								hypothetical protein
orf_1020	x																																										Predicted DHHC-type Zn-finger protein (similar to PFA3;)
orf_1022					x																																						Predicted DHHC-type Zn-finger protein (similar to PFA3;)
orf_1023	x																																										hypothetical protein
orf_1024		x																																									Predicted Zn-finger protein
orf_1025	x																	x																									60S acidic ribosomal protein P0 (similar to RPP0;)
orf_1026								x					x																x														hypothetical protein
orf_1027	x																																										Regulator of spindle pole body duplication (similar to ESP1;)
orf_1028	x			x					x										x																								RNA polymerase II transcription initiation/nucleotide excision repair factor TFIIH, subunit SSL1 (similar to SSL1;)
orf_1030	x			x	x	x	x																																				26S proteasome regulatory complex, subunit RPN1/PSMD2 (similar to RPN1;)
orf_1034			x	x																																							putative LRR containing protein
orf_1038	x																																										60S ribosomal protein L3 and related proteins (similar to RPL3;)
orf_1040	x																																										Seryl-tRNA synthetase (similar to SES1; DIA4;)
orf_1042		x	x		x										x																												hypothetical protein
orf_1047	x																																										FOG: Predicted E3 ubiquitin ligase (similar to ASR1;)
orf_105	x																																										hypothetical protein
orf_1054		x																																									putative LRR containing protein
orf_1058	x																																										Ubiquitin C-terminal hydrolase (similar to UBP12; UBP10;)
orf_1061		x																																									hypothetical protein
orf_1066																			x																								hypothetical protein
orf_107			x	x	x				x																	x																	hypothetical protein
orf_1070	x																																										hypothetical protein
orf_1071	x																																										DNA-binding cell division cycle control protein (similar to CDC27;)
orf_1075	x																																										Glucosamine-phosphate N-acetyltransferase (similar to GNA1;)
orf_1077	x																																										hypothetical protein
orf_108			x	x	x				x																	x																	Mitochondrial sulfhydryl oxidase involved in the biogenesis of cytosolic Fe/S proteins (similar to ERV2; ERV1;)
orf_1082	x																																										Kinesin (KAR3 subfamily) (similar to KAR3;)
orf_1085	x																																										protein containing WD40/YVTN repeat-like-containing domain, WD40 repeat-like-containing domain
orf_1086	x																																										Single-stranded DNA-binding replication protein A (RPA), medium (30 kD) subunit (similar to RFA2;)
orf_1088			x			x	x					x									x					x																	hypothetical protein
orf_1097			x	x	x				x										x																								hypothetical protein
orf_1102			x		x				x																	x																	Pyruvate kinase (similar to PYK2; CDC19;)
orf_1104																										x																	hypothetical protein
orf_1105		x																																									hypothetical protein
orf_1107	x	x																																									60S ribosomal protein L37
orf_1108	x																																										hypothetical protein
orf_1109	x																																										hypothetical protein
orf_1113	x					x	x					x								x	x																						hypothetical protein
orf_1119	x																																										Transcription factor MBF1 (similar to MBF1;)
orf_1123	x		x	x	x	x			x		x	x														x								x									hypothetical protein
orf_113														x												x	x																hypothetical protein
orf_1132	x							x		x											x								x														60S ribosomal protein L35 (similar to RPL35B; RPL35A;)
orf_1133	x																																										Threonyl-tRNA synthetase (similar to THS1; MST1;)
orf_1134	x																																										Small Nuclear ribonucleoprotein G (similar to SMX2;)
orf_1135	x																																										Phosphatidylinositol synthase (similar to PIS1;)
orf_1136	x																																										ubiquitin---protein ligase
orf_1138		x	x						x		x																																Meiotic recombination protein Dmc1 (similar to DMC1;)
orf_114				x																																							hypothetical protein
orf_1146		x																																									hypothetical protein
orf_115	x			x	x																																						Vesicle coat complex COPII, GTPase subunit SAR1 (similar to SAR1;)
orf_1154			x																																								SNARE protein YKT6, synaptobrevin/VAMP syperfamily (similar to YKT6;)
orf_116			x	x										x												x																	hypothetical protein
orf_1166	x			x	x																																	x					The ATP:ADP Antiporter (AAA) Family [2.A.15]
orf_117		x																																									uncharacterised conserved transporter
orf_1170				x	x				x					x												x																	mRNA cleavage and polyadenylation factor II complex, subunit CFT2 (CPSF subunit) (similar to CFT2;)
orf_1173	x																																										Molecular chaperone (DnaJ superfamily) (similar to SIS1; JJJ3; JJJ2; HLJ1;)
orf_1178	x																																										hypothetical protein
orf_1179		x																																									hypothetical protein
orf_118	x				x	x	x		x					x							x																						hypothetical protein
orf_1181	x																																										Regulator of arginine metabolism and related MADS box-containing transcription factors (similar to MCM1; ARG80;)
orf_1182	x																																										non-specific serine/threonine protein kinase
orf_1183	x																																										hypothetical protein
orf_1185	x																																										hypothetical protein
orf_1193		x																																									hypothetical protein
orf_12																										x																	Asparagine synthase
orf_120		x																																									putative LRR containing protein
orf_1201	x																																										Asparaginyl-tRNA synthetase (similar to DED81;)
orf_1202	x																																										putative transporter
orf_1209	x																																										mRNA cleavage and polyadenylation factor I/II complex, subunit Pcf11 (similar to PCF11;)
orf_121			x	x	x				x		x						x	x					x		x		x							x									Glycogen synthase kinase-3 (similar to YGK3; RIM11; MRK1; MCK1;)
orf_1212	x				x			x	x	x							x	x	x						x																		hypothetical protein
orf_1213	x																																										The Choline Transporter-like (CTL) Family [2.A.92 ]
orf_1214	x																																										TFIIF-interacting CTD phosphatase, including NLI-interacting factor (involved in RNA polymerase II regulation) (similar to PSR2; PSR1; NEM1;)
orf_1219	x					x	x					x								x	x																						protein containing Like-Sm ribonucleoprotein (LSM) domain, Like-Sm ribonucleoprotein (LSM)-related domain, Like-Sm ribonucleoprotein (LSM) domain, eukaryotic/archaea-type
orf_122		x																																									Glucosamine 6-phosphate synthetases, contain amidotransferase and phosphosugar isomerase domains (similar to GFA1; DUG3;)
orf_1220	x																																										DNA helicase
orf_1222	x																																										The Anion Exchanger (AE) Family [2.A.31]; The Anion Exchanger (AE) Family [2.A.31]
orf_123						x						x									x							x															Nucleoside phosphatase (similar to GDA1;)
orf_1231	x																																										Chromodomain-helicase DNA-binding protein (similar to CHD1;)
orf_1232	x																																										Acyl-CoA thioesterase (similar to TES1;)
orf_1234	x	x																																									Protein disulfide isomerase (prolyl 4-hydroxylase beta subunit) (similar to PDI1; EUG1;)
orf_1235		x				x	x					x				x					x	x																					hypothetical protein
orf_1236	x																																										ATP-dependent RNA helicase (similar to DHH1;)
orf_1237				x	x			x	x	x			x	x								x																					protein containing Rho GTPase activation protein, Rho GTPase-activating protein domain
orf_124	x																																										Uncharacterized conserved protein (similar to HCH1; AHA1;)
orf_1247			x	x	x																																						hypothetical protein
orf_1248		x																																									hypothetical protein
orf_125			x	x																						x																	hypothetical protein
orf_1251	x				x																		x																				hypothetical protein
orf_1252			x	x	x				x					x					x								x																hypothetical protein
orf_1258	x																																										Actin-related protein - Arp5p (similar to ARP5;)
orf_1260		x																																									hypothetical protein
orf_1261	x			x	x	x	x	x		x											x								x								x						20S proteasome, regulatory subunit beta type PSMB7/PSMB10/PUP1 (similar to PUP1;)
orf_1262	x																																										protein containing Staphylococcal nuclease (SNase-like) domain
orf_1263		x																																									hypothetical protein
orf_1268		x																																									hypothetical protein
orf_1273	x																																										hypothetical protein
orf_1274	x																																										hypothetical protein
orf_1275	x																																										protein containing Kinesin, motor domain
orf_1276		x																																									hypothetical protein
orf_1277	x		x	x	x																																						Dihydrofolate reductase (similar to DFR1;)
orf_1278	x		x																																								40S ribosomal protein S4 (similar to RPS4B; RPS4A;)
orf_1279							x		x		x						x						x																				hypothetical protein
orf_1283				x	x								x	x			x																				x						Chromosome condensation complex Condensin, subunit D2 (similar to YCS4;)
orf_1286																											x																Cis-prenyltransferase (similar to SRT1; RER2;)
orf_1287	x																																										hypothetical protein
orf_1289	x																		x																								mRNA deadenylase subunit (similar to POP2;)
orf_1290		x	x						x										x																								hypothetical protein
orf_1293					x																																						hypothetical protein
orf_1296	x																																										Dolichol-phosphate mannosyltransferase (similar to DPM1;)
orf_1299	x																																										E3 ubiquitin ligase (similar to SAN1; HRD1;)
orf_1302	x																																										G protein beta subunit-like protein (similar to ASC1;)
orf_1305	x																																										Haloacid dehalogenase-like hydrolase (similar to SDT1; PHM8;)
orf_1307	x																																										6-phosphogluconate dehydrogenase (similar to GND2; GND1;)
orf_1310	x																																										Replication factor C, subunit RFC1 (large subunit) (similar to RFC1; ELG1;)
orf_1315		x																																									protein containing Zinc finger, RING-type, Zinc finger, RING/FYVE/PHD-type, Zinc finger, C3HC4 RING-type
orf_1316		x																																									hypothetical protein
orf_1317	x																									x																	protein containing Ricin B-related lectin
orf_132		x																																									putative LRR containing protein
orf_1321	x																																										Phosphoglucomutase/phosphomannomutase (similar to PCM1;)
orf_1322	x						x					x								x																							protein containing Homeodomain-like, Homeodomain-related, SANT domain, DNA binding
orf_1324	x																																										hypothetical protein
orf_1326	x		x	x	x	x			x	x				x												x			x														Regulator of nuclear mRNA (similar to RTT103;)
orf_1327	x																																										Translation elongation factor 2/ribosome biogenesis protein RIA1 and related proteins (similar to RIA1;)
orf_1328		x	x	x	x	x		x		x																			x														hypothetical protein
orf_1330	x				x																																						phosphoprotein phosphatase
orf_1332																																					x						Translation initiation factor 2, gamma subunit (eIF-2gamma; GTPase) (similar to GCD11;)
orf_1336	x		x	x	x				x		x												x			x	x																Uncharacterized conserved protein
orf_1337	x	x																																									hypothetical protein
orf_1338	x																																										ATP binding protein (similar to PLP1;); Protein containing Thioredoxin domain
orf_1339		x	x	x	x			x		x																			x														hypothetical protein
orf_134	x					x																																					TatD-related DNase
orf_1340	x	x																																									bifunctional Thymidylate synthase (similar to CDC21;)/dihydrofolate reductase
orf_1341	x																																										Meiotic cell division protein Pelota/DOM34 (similar to DOM34;)
orf_1343	x																																										hypothetical protein
orf_1344	x		x	x	x									x					x																								Glycerol-3-phosphate dehydrogenase/dihydroxyacetone 3-phosphate reductase (similar to GPD2; GPD1;)
orf_1345	x																																										Golgi reassembly stacking protein GRASP65, contains PDZ domain (similar to GRH1;)
orf_1350		x	x	x	x	x		x		x																			x														hypothetical protein
orf_1352	x																																										hypothetical protein
orf_1356	x			x	x	x	x					x	x	x			x		x	x																				x			DNA replication licensing factor, MCM5 component (similar to MCM5;)
orf_1359	x																																										hypothetical protein
orf_1363	x				x																																						Predicted membrane protein
orf_1364									x																																		hypothetical protein
orf_1365	x					x		x		x						x										x	x																hypothetical protein
orf_1366	x		x		x				x				x																														Pattern-formation protein/guanine nucleotide exchange factor (similar to GEA2; GEA1;)
orf_1367	x																																										Vacuolar H+-ATPase V0 sector, subunit d (similar to VMA6;)
orf_1369				x	x	x													x																								Transcription factor of the Forkhead/HNF3 family (similar to HCM1; FKH2; FKH1; FHL1;)
orf_1370	x				x																	x																					Protein required for 18S rRNA maturation and 40S ribosome biogenesis (similar to EMG1;)
orf_1373	x								x																																		hypothetical protein
orf_1375		x			x																																						protein containing Homeodomain-like, Homeodomain-related, Helix-turn-helix motif, lambda-like repressor, Homeobox
orf_1376		x																																									Transcription factor, contains HOX domain (similar to YOX1; YHP1;)
orf_1377	x																		x																								Actin and related proteins (similar to ARP9; ARP1; ACT1;)
orf_1379	x																																										Aminopeptidase I zinc metalloprotease (M18) (similar to LAP4;)
orf_138	x																																										40S ribosomal protein S2/30S ribosomal protein S5 (similar to RPS2;)
orf_1380	x																																										DNA replication licensing factor, MCM6 component (similar to MCM6;)
orf_1382		x	x	x	x				x																																		uncharacterised conserved transporter
orf_1383	x																																										hypothetical protein
orf_1386	x																																										Zuotin and related molecular chaperones (DnaJ superfamily), contains DNA-binding domains (similar to ZUO1; ERJ5;)
orf_1387	x						x	x		x																																	Protein involved in cell differentiation/sexual development (similar to CAF40;)
orf_1388					x									x		x										x																	AAA+-type ATPase (similar to PCH2;)
orf_139	x															x																											Transcription elongation factor SPT6 (similar to SPT6;)
orf_1390					x																																						hypothetical protein
orf_1391	x			x	x																																						hypothetical protein
orf_1396	x																																										hypothetical protein
orf_1397	x																																										AAA+-type ATPase (similar to CDC48; AFG2;)
orf_1398	x				x																					x																	26S proteasome regulatory complex, ATPase RPT5 (similar to RPT5;)
orf_1399	x				x				x																			x															Mitochondrial matrix protein frataxin, involved in Fe/S protein biosynthesis (similar to YFH1;)
orf_140	x				x										x	x																											hypothetical protein
orf_1405	x																																										DNA mismatch repair protein - MLH1 family (similar to MLH1;)
orf_1406				x	x																					x																	hypothetical protein
orf_1415		x																																									FOG: Transposon-encoded proteins with TYA, reverse transcriptase, integrase domains in various combinations; LTR Retrotransposon
orf_1428				x	x						x																																hypothetical protein
orf_143		x																																									putative LRR containing protein
orf_1430	x																																										Chaperonin complex component, TCP-1 delta subunit (CCT4) (similar to CCT4;)
orf_1431	x		x	x	x	x		x		x																x	x		x														protein containing WD40/YVTN repeat-like-containing domain, WD40 repeat-like-containing domain
orf_1433	x																																										RNA binding/translational regulation protein of the SUA5 family (similar to SUA5;)
orf_1436	x		x	x	x			x		x			x		x						x								x			x											hypothetical protein
orf_1438		x																																									hypothetical protein
orf_1439	x																																										hypothetical protein
orf_1440	x																																										hypothetical protein
orf_1442	x																																										Predicted sugar kinase
orf_1443					x													x																									hypothetical protein
orf_1444	x																																										Translation initiation factor 3, subunit i (eIF-3i)/TGF-beta receptor-interacting protein (TRIP-1) (similar to TIF34;)
orf_1447	x								x																																		hypothetical protein
orf_1448	x																																										hypothetical protein
orf_1450	x							x		x																			x														Endonuclease MUS81 (similar to MUS81;)
orf_1452	x		x	x	x																																						hypothetical protein
orf_1454	x																																										hypothetical protein
orf_1456					x				x																																		Polyadenylate-binding protein (RRM superfamily) (similar to PES4; PAB1; MIP6;)
orf_1457	x																																										Predicted E3 ubiquitin ligase (similar to MPE1;)
orf_1458	x																																										protein containing Heat shock protein DnaJ, N-terminal, Molecular chaperone, heat shock protein, Hsp40, DnaJ
orf_1459	x																																										CCR4-NOT transcriptional regulation complex, NOT5 subunit (similar to NOT5; NOT3;)
orf_1461	x																																										DNA polymerase sigma (similar to TRF5; PAP2;)
orf_1463	x				x														x																								protein containing WD40/YVTN repeat-like-containing domain, WD40 repeat, subgroup, WD40 repeat, WD40 repeat-like-containing domain
orf_1465	x																																										FYVE finger containing protein (similar to PIB2; PIB1;)
orf_1472		x																																									hypothetical protein
orf_1473	x			x	x		x		x					x						x							x																protein containing WD40/YVTN repeat-like-containing domain, WD40 repeat-like-containing domain
orf_1474	x																																										Transcription initiation factor TFIIIB, Brf1 subunit (similar to BRF1;)
orf_1475	x			x																																							Class 2 transcription repressor NC2, alpha subunit (DRAP1) (similar to BUR6;)
orf_1476	x																																										Elongation factor 2 (similar to EFT2; EFT1;)
orf_1484	x																																										Transcriptional repressor EED/ESC/FIE, required for transcriptional silencing, WD repeat superfamily
orf_1486	x																																										hypothetical protein
orf_1487	x																																										Putative RNA methylase (similar to TRM11;)
orf_1488	x																																										hypothetical protein
orf_1491	x																																										triose-phosphate transporter (TPT); GDP-Mannose:GMP Antiporter (GMA) Family [2.A.7.13]
orf_1494													x																														Paf1/RNA polymerase II complex, RTF1 component (involved in regulation of TATA box-binding protein) (similar to RTF1;)
orf_150		x																																									uncharacterised conserved transporter
orf_1500	x		x										x													x																	hypothetical protein
orf_1501	x																																										Anaphase-promoting complex (APC), Cdc23 subunit (similar to CDC23;)
orf_1507	x																																										Nuclear pore complex, Nup98 component (sc Nup145/Nup100/Nup116) (similar to NUP49; NUP42; NUP145; NUP116; NUP100;)
orf_1509		x																																									Predicted E3 ubiquitin ligase (similar to RMD5;)
orf_151	x																																										Predicted RNA methylase involved in rRNA processing (similar to RRP8;)
orf_1516	x																																										60S ribosomal protein L35A/L37 (similar to RPL33B; RPL33A;)
orf_152	x																																										hypothetical protein
orf_1523	x																																										hypothetical protein
orf_1525	x																																										hypothetical protein
orf_1528																										x																	Lysophosphatidic acid acyltransferase LPAAT and related acyltransferases (similar to CST26;)
orf_1529					x																																						Splicing factor RNPS1, SR protein superfamily (similar to SGN1;)
orf_153	x																										x										x						26S proteasome regulatory complex, ATPase RPT2 (similar to RPT2;)
orf_1530	x																																										hypothetical protein
orf_1533				x	x													x								x	x																hypothetical protein
orf_1535				x	x								x	x													x																60S ribosomal protein L11 (similar to RPL11B; RPL11A;)
orf_154	x																																										Golgi SNAP receptor complex member (similar to BOS1;)
orf_1541	x																																										hypothetical protein
orf_1542	x		x		x	x																																					hypothetical protein
orf_1543	x			x		x	x	x		x				x						x									x														hypothetical protein
orf_1544	x		x	x		x	x	x	x	x		x						x	x		x						x		x														non-specific serine/threonine protein kinase
orf_1547						x										x						x																					hypothetical protein
orf_1551	x	x																																									Histone 2A (similar to HTA2; HTA1;)
orf_1552	x		x	x	x				x																	x																	Transcription factor of the Forkhead/HNF3 family (similar to HCM1; FKH2; FKH1; FHL1;)
orf_1554	x																																										hypothetical protein
orf_1557	x		x		x																																						putative LRR containing protein
orf_1560	x																																										Deoxyribodipyrimidine photolyase/cryptochrome (similar to PHR1;)
orf_1562	x																																										ATP-dependent RNA helicase (similar to MRH4; DED1; DBP1;)
orf_1563	x					x																																					protein containing Ubiquitin, Ubiquitin subgroup
orf_1565	x		x		x																					x																	hypothetical protein
orf_1566	x																																										60S ribosomal protein L7A (similar to RPL8B; RPL8A;)
orf_157	x					x	x		x			x			x			x		x	x									x		x											Beta-tubulin folding cofactor C
orf_1575	x																																										hypothetical protein
orf_1577	x																																										60S ribosomal protein L37 (similar to RPL43B; RPL43A;)
orf_1578	x																																										DNA-directed RNA polymerase, subunit RPB7.0 (similar to RPC10;)
orf_158			x	x	x				x					x					x							x																	hypothetical protein
orf_1591	x																																										mRNA cleavage and polyadenylation factor II complex, subunit CFT1 (CPSF subunit) (similar to CFT1;)
orf_1592				x	x			x		x																																	hypothetical protein
orf_1594		x	x			x	x		x						x			x	x	x	x	x								x													putative LRR containing protein
orf_1595									x						x			x														x											40s ribosomal protein S26 (similar to RPS26B; RPS26A;)
orf_1597															x																												hypothetical protein
orf_16	x	x																																									Translation initiation factor 6 (eIF-6) (similar to TIF6;)
orf_160	x																									x	x																Metalloprotease (similar to STE24;)
orf_1600	x																																										Chaperonin complex component, TCP-1 zeta subunit (CCT6) (similar to CCT6;)
orf_1602		x																																									protein containing VTC domain, Protein of unknown function DUF202
orf_1608	x																																										hypothetical protein
orf_161	x		x						x								x																										Cdc2-related protein kinase (similar to SGV1; CTK1;)
orf_1614	x																																										Vacuolar sorting protein VPS1, dynamin, and related proteins (similar to VPS1; MGM1; DNM1;)
orf_1619			x	x											x																												The Small Conductance Mechanosensitive Ion Channel (MscS) Family [1.A.24]
orf_162	x																																										60s ribosomal protein L6 (similar to RPL6B; RPL6A;)
orf_1621		x		x	x	x		x	x	x				x																													putative LRR containing protein
orf_1623	x																																										protein containing Zinc finger, SWIM-type, Zinc finger, PMZ-type
orf_1624	x																																										Histone H3 (Lys4) methyltransferase complex and RNA cleavage factor II complex, subunit SWD2 (similar to SWD2;)
orf_1629	x																																										Small nuclear ribonucleoprotein (snRNP) (similar to LSM4;)
orf_163	x																																										RNA polymerase III transcription factor (TF)IIIC subunit (similar to TFC1;)
orf_1632	x				x								x																														protein containing Histone H4 acetyltransferase, NuA4 complex, Eaf6
orf_1633	x																										x																DNA-directed RNA polymerase, subunit L (similar to RPC19;)
orf_1636		x																																									hypothetical protein
orf_1637	x																																										Vesicle coat complex COPI, alpha subunit (similar to COP1;)
orf_1638															x																												protein containing Rab-GAP/TBC domain
orf_1645	x																																										putative transporter
orf_165	x																																										mRNA export protein (contains WD40 repeats) (similar to GLE2;)
orf_1650	x																																										protein containing Sgf11, transcriptional regulation
orf_1651				x																																							protein-tyrosine-phosphatase
orf_1656	x																																										Thioredoxin reductase (similar to TRR2; TRR1;)
orf_1657				x	x				x					x																													DNA excision repair protein XPA/XPAC/RAD14 (similar to RAD14;)
orf_1662	x																																										Ubiquitin fusion-degradation protein (similar to UFD1;)
orf_1664	x																																										hypothetical protein
orf_1666	x																																										hypothetical protein
orf_1668	x															x																											Cytosine deaminase FCY1 and related enzymes (similar to TAD2; RIB2; FCY1;)
orf_1669		x	x		x																																						hypothetical protein
orf_1670	x																																										Glutaredoxin and related proteins (similar to PRM4; GRX8; GRX7; GRX6; GRX2; GRX1;)
orf_1673	x																																										Histone acetyltransferase SAGA/ADA, catalytic subunit PCAF/GCN5 and related proteins (similar to SPT7; GCN5;)
orf_1675	x			x	x				x					x		x																											Nucleolar GTPase (similar to NOG2;)
orf_1676	x																																										DNA-directed RNA polymerase subunit E' (similar to RPC25;)
orf_1678	x																																										Uncharacterized conserved protein
orf_1679	x																																										Chromatin remodeling complex WSTF-ISWI, small subunit (similar to ISW2; ISW1; IRC5;)
orf_168							x															x																					hypothetical protein
orf_1681	x																																										The Major Facilitator Superfamily (MFS) [2.A.2]
orf_1682	x		x	x					x																																		hypothetical protein
orf_1685	x																																										RNA polymerase II transcription initiation/nucleotide excision repair factor TFIIH, 3'-5' helicase subunit SSL2 (similar to SSL2;)
orf_169	x		x	x	x																																						hypothetical protein
orf_1692	x	x																																									26S proteasome regulatory complex, subunit RPN9/PSMD13 (similar to RPN9;)
orf_1693	x																																										histone-lysine N-methyltransferase
orf_1694					x																																						Septin family protein (P-loop GTPase) (similar to SPR3; SPR28; SHS1; CDC3; CDC12; CDC11;)
orf_1696	x																																										Chaperonin complex component, TCP-1 eta subunit (CCT7) (similar to CCT7;)
orf_1697	x																																										Exocyst complex subunit SEC6 (similar to SEC6;)
orf_1701	x																																										hypothetical protein
orf_1704	x																																										Chitin synthase/hyaluronan synthase (glycosyltransferases) (similar to CHS3; CHS2; CHS1;)
orf_1705	x		x	x	x				x																																		Serine/threonine protein kinase of the CDC7 subfamily involved in DNA synthesis, repair and recombination (similar to CDC7;)
orf_1706	x																x																										hypothetical protein
orf_1707	x			x	x				x					x								x																					Glutamyl-tRNA synthetase (similar to GUS1;)
orf_1709			x	x	x	x	x		x												x						x																Myosin class II heavy chain (similar to MYO1;)
orf_1710	x	x			x	x	x		x			x				x				x	x																						The ATP-binding Cassette (ABC) Superfamily [3.A.3]
orf_1716		x				x														x	x									x													putative LRR containing protein
orf_1720	x																																										Signal recognition particle, subunit Srp54 (similar to SRP54;)
orf_1721	x		x	x	x				x																																		Transcription initiation factor IID subunit (similar to TAF13;)
orf_1724	x																																										hypothetical protein
orf_1726	x																																										RNA-binding protein (RRM superfamily) (similar to MRD1;)
orf_1730				x	x	x	x		x																	x																	chitin deacetylase
orf_1731	x																																										hypothetical protein
orf_1732			x	x	x				x					x		x											x													x			hypothetical protein
orf_1735	x																																										hypothetical protein
orf_1736	x		x	x			x																			x																	Cyclophilin type peptidyl-prolyl cis-trans isomerase (similar to CPR3;)
orf_1746	x																																										Translation initiation factor 2B, epsilon subunit (eIF-2Bepsilon/GCD6) (similar to GCD6;)
orf_1748	x																																										Vacuolar H+-ATPase V1 sector, subunit B (similar to VMA2;)
orf_1749	x		x	x	x				x																	x																	hypothetical protein
orf_1750				x	x																																						protein containing Histone acetyltransferases subunit 3
orf_1751	x								x							x																											Replication factor C, subunit RFC3 (similar to RFC5;)
orf_1753	x																																										hypothetical protein
orf_176	x																																										hypothetical protein
orf_1760		x	x	x	x	x	x					x								x	x									x													hypothetical protein
orf_1761	x				x																																						Translation initiation factor 2, beta subunit (eIF-2beta) (similar to SUI3;)
orf_1768	x																																										Protein required for normal rRNA processing (similar to NOP7;)
orf_177	x				x																																						hypothetical protein
orf_1771	x																																										protein containing Elongator complex protein 4
orf_1772	x																																										Microtubule-associated protein essential for anaphase spindle elongation (similar to ASE1;)
orf_1773			x										x									x																					Histone acetyltransferase PCAF/SAGA, subunit SUPT3H/SPT3 (similar to SPT3;)
orf_1775	x				x										x							x																					Translation initiation factor 1A (eIF-1A) (similar to TIF11;)
orf_1777	x																																										hypothetical protein
orf_1778	x																																										hypothetical protein
orf_1779	x				x			x		x			x																											x			hypothetical protein
orf_1780	x		x																																								Nuclear cap-binding protein complex, subunit CBP20 (RRM superfamily) (similar to CBC2;)
orf_1782				x	x								x																														Glutathione peroxidase (similar to HYR1; GPX2; GPX1;)
orf_1784	x																																										hypothetical protein
orf_1785	x																																										hypothetical protein
orf_1787	x																																										hypothetical protein
orf_1788			x	x	x				x																																		hypothetical protein
orf_1789		x																																									hypothetical protein
orf_1790	x																																										Centromere-associated protein NUF2 (similar to NUF2;)
orf_1792																										x																	The H+- or Na+-translocating F-type, V-type and A-type ATPase (F-ATPase) Superfamily [3.A.4]
orf_1793	x																																										hypothetical protein
orf_1795	x			x																																							Serine/threonine specific protein phosphatase involved in glycogen accumulation, PP2A-related (similar to PPH3; PPG1;)
orf_180		x																																									hypothetical protein
orf_1800																										x	x																protein containing Transcription factor, enhancer of yellow 2
orf_1802	x																																										P-type ATPase (similar to DRS2; DNF3; DNF2; DNF1;)
orf_1805	x		x										x													x																	Predicted cell surface protein homologous to bacterial outer membrane proteins (similar to SAM50;)
orf_1809		x																																									hypothetical protein
orf_182	x																																										Rab GTPase interacting factor, Golgi membrane protein (similar to YIP1;)
orf_1820	x																																										Myosin regulatory light chain, EF-Hand protein superfamily
orf_1827	x																																										E3 ubiquitin protein ligase (similar to HUL4;)
orf_183	x																																										Transcription initiation factor TFIID, subunit TAF11 (similar to TAF11;)
orf_1831	x																																										26S proteasome regulatory complex, ATPase RPT1 (similar to RPT1;)
orf_1832	x			x	x																																						Endoplasmic reticulum membrane-associated oxidoreductin involved in disulfide bond formation (similar to ERO1;)
orf_1835	x			x					x																																		hypothetical protein
orf_1836	x																																										40S ribosomal protein S2 (similar to RPL12B; RPL12A;)
orf_1839		x	x	x	x				x																																		Haloacid dehalogenase-like hydrolase (similar to SDT1; PHM8;)
orf_184																											x																non-specific serine/threonine protein kinase; polo kinase
orf_1841	x																																										Diadenosine polyphosphate hydrolase and related proteins of the histidine triad (HIT) family (similar to HNT2;)
orf_1842	x			x	x				x																																		Notchless-like WD40 repeat-containing protein (similar to RSA4;)
orf_1846	x																																										Ubiquitin C-terminal hydrolase (similar to UBP12; UBP10;); Protein containing Peptidase C19, ubiquitin carboxyl-terminal hydrolase 2
orf_1848			x	x			x		x			x		x						x										x													protein containing Hexokinase, N-terminal
orf_1850		x																																									hypothetical protein
orf_1851	x																																										Dual-specificity tyrosine-phosphorylation regulated kinase (similar to YAK1;)
orf_1855	x		x		x				x					x																													hypothetical protein
orf_1856		x																																									hypothetical protein
orf_1857	x																																										Predicted ATPase, nucleotide-binding (similar to NBP35; CFD1;)
orf_1858	x																																										GTP-binding protein AARP2 involved in 40S ribosome biogenesis (similar to BMS1;)
orf_1860	x																																										hypothetical protein
orf_1868	x	x																																									Molecular chaperones HSP70/HSC70, HSP70 superfamily (similar to SSZ1; SSB2; SSA4; SSA3; SSA2; SSA1;)
orf_1869			x																																								hypothetical protein
orf_187	x																																										DNA topoisomerase III alpha (similar to TOP3;)
orf_1873	x		x		x				x											x																							Uncharacterized conserved protein, contains RtcB domain
orf_1876	x																																										hypothetical protein
orf_1877		x																																									Vesicle coat complex AP-1/AP-2/AP-4, beta subunit (similar to APL2;)
orf_1879	x																																										Predicted N6-DNA-methyltransferase (similar to MTQ2;)
orf_188				x	x	x	x					x	x	x						x	x									x							x						hypothetical protein
orf_1880	x																																										hypothetical protein
orf_1881	x																																										putative transporter
orf_1884						x	x					x								x	x																						hypothetical protein
orf_1885	x	x																																									putative transporter
orf_1886		x							x																	x																	putative transporter
orf_1887	x		x		x																					x	x																Histone H2B (similar to HTB2; HTB1;)
orf_1891	x				x				x																																		mRNA cleavage and polyadenylation factor I complex, subunit RNA15 (similar to RNA15; PTI1; PIN4;)
orf_1894	x																																										FOG: RCC1 domain (similar to SRM1; FMP25; ATS1;)
orf_1895	x																																										40S ribosomal protein S15 (similar to RPS15;)
orf_1896	x																																										Medium subunit of clathrin adaptor complex (similar to RET2;)
orf_1897					x																					x																	hypothetical protein
orf_1903	x				x	x	x														x					x																	Cyclin B and related kinase-activating proteins (similar to CLN3; CLN2; CLN1; CLB6; CLB5; CLB4; CLB3; CLB2; CLB1;)
orf_1904	x		x	x	x				x													x																					hypothetical protein
orf_1905	x																																										protein containing WD40/YVTN repeat-like-containing domain, WD40 repeat-like-containing domain
orf_1907	x			x	x				x									x								x																	Ca2+ sensor (EF-Hand superfamily) (similar to FRQ1;)
orf_1911	x																																										hypothetical protein
orf_1918	x																																										Predicted GTP-binding protein MMR1 (similar to LSG1;)
orf_1919	x		x	x	x																																						Protein kinase PCTAIRE and related kinases (similar to PHO85; CDC28; CAK1;)
orf_1920	x																																										hypothetical protein
orf_1921	x																										x																Predicted unusual protein kinase
orf_1922	x		x	x	x		x																				x																The Small Conductance Mechanosensitive Ion Channel (MscS) Family [1.A.23]
orf_1929					x									x																													hypothetical protein
orf_1934	x																																										Acyl-CoA thioesterase (similar to TES1;)
orf_1935	x	x							x																	x																	Choline kinase (similar to EKI1; CKI1;)
orf_1936															x																												hypothetical protein
orf_1938					x	x	x																																				hypothetical protein
orf_1939	x																																										protein containing Nucleotide-binding, alpha-beta plait, RNA recognition motif domain
orf_194	x																																										Structural maintenance of chromosome protein SMC5/Spr18, SMC superfamily (similar to SMC5;)
orf_1943	x																																										20S proteasome, regulatory subunit alpha type PSMA5/PUP2 (similar to PUP2;)
orf_1945	x																																										Translation initiation factor 2B, gamma subunit (eIF-2Bgamma/GCD1) (similar to GCD1;)
orf_1946		x																																									Glutaredoxin-related protein (similar to GRX5; GRX4; GRX3;)
orf_1948	x																																										Predicted RNA-binding protein with PUA domain (similar to TMA20;)
orf_1951	x																																										hypothetical protein
orf_1955		x																																									Ubiquitin-specific protease (similar to UBP8; UBP1;); Protein containing Peptidase C19, ubiquitin carboxyl-terminal hydrolase 2
orf_1957						x	x					x								x	x																						hypothetical protein
orf_1958						x	x					x							x	x	x									x													Glutathione synthetase (similar to GSH2;)
orf_1959	x																																										hypothetical protein
orf_1962			x	x	x				x																																		3-phosphoglycerate kinase (similar to PGK1;)
orf_1969		x																																									The P-type ATPase (P-ATPase) Superfamily [3.A.3]
orf_1971		x			x																																						hypothetical protein
orf_1978			x																								x																hypothetical protein
orf_1981	x																																										Deoxycytidylate deaminase (similar to DCD1;)
orf_1987		x		x																																							putative LRR containing protein
orf_1989	x																																										RNA polymerase III, second largest subunit
orf_1990	x																																										Predicted membrane protein (similar to ORM2; ORM1;)
orf_1991																x																											hypothetical protein
orf_1992	x																																										protein containing WD40/YVTN repeat-like-containing domain, WD40 repeat
orf_1998	x																																										Apoptosis-related protein/predicted DNA-binding protein
orf_1999			x	x	x																					x																	hypothetical protein
orf_2001			x	x	x				x																		x																Uncharacterized conserved protein
orf_2004		x	x	x	x				x																																		hypothetical protein
orf_2007	x																																										dolichyldiphosphatase
orf_201	x																																										hypothetical protein
orf_2010	x																																										Origin recognition complex, subunit 2 (similar to ORC2;)
orf_2012							x																				x																Chromatin remodeling protein, contains PHD Zn-finger (similar to YNG2; YNG1; PHO23;)
orf_2013	x																																										Transcriptional regulator SOH1 (similar to SOH1;)
orf_2014	x				x										x			x														x											DNA polymerase delta, regulatory subunit 55 (similar to POL31;)
orf_2016	x																																										hypothetical protein
orf_2017	x														x																												The Zinc (Zn2+)-Iron (Fe2+) Permease (ZIP) Family [2.A.6]
orf_202									x								x		x																								hypothetical protein
orf_2021																						x																					protein containing Cyclin, N-terminal, Cyclin-related
orf_2023	x																																										Uncharacterized Zn ribbon-containing protein (similar to ELF1;)
orf_2024	x																																										5'-3' exonuclease (similar to YEN1; RAD2;)
orf_2025	x																																										hypothetical protein
orf_2027	x																																										SMT3/SUMO-activating complex, catalytic component UBA2 (similar to UBA2;)
orf_203				x																																							FOG: Zn-finger (similar to ZAP1; USV1; SWI5; STP4; STP3; RSF2; RPH1; RME1; RIM101; RGM1; PZF1; NRG2; NRG1; MSN4; MSN2; MIG3; MIG2; MIG1; MET32; MET31; GIS1; FZF1; CRZ1; AZF1; ADR1; ACE2;)
orf_2033	x																										x																Zinc-binding protein of the histidine triad (HIT) family (similar to HNT1;)
orf_2036	x																																										Molecular chaperone (DnaJ superfamily) (similar to SIS1; JJJ3; JJJ2; HLJ1;)
orf_2037	x		x	x	x				x																																		hypothetical protein
orf_204																										x																	Uncharacterized conserved protein (similar to YJU2;)
orf_2040	x																																										Prolyl-tRNA synthetase
orf_2041			x	x	x											x																											Serine/threonine specific protein phosphatase PP1, catalytic subunit (similar to PPZ2; PPZ1; PPQ1; GLC7;)
orf_2043				x	x																																						AAA+-type ATPase (similar to YTA6; SAP1;)
orf_2044	x																																										Transcription initiation factor TFIID, subunit TAF10 (also component of histone acetyltransferase SAGA) (similar to TAF10;)
orf_2045	x																																										hypothetical protein
orf_2046	x														x																												Exocyst complex subunit Sec8 (similar to SEC8;)
orf_2048	x																																										hypothetical protein
orf_2049	x																																										GTPase XAB1, interacts with DNA repair protein XPA (similar to NPA3;)
orf_2050			x		x				x																																		hypothetical protein
orf_2051	x																																										Glucose-repressible alcohol dehydrogenase transcriptional effector CCR4 and related proteins (similar to NGL1; CCR4;)
orf_2054	x																																										40S ribosomal protein S7 (similar to RPS7B; RPS7A;)
orf_2055	x				x																																						hypothetical protein
orf_2059	x		x	x	x				x				x																														Predicted RNA-binding protein Pno1p interacting with Nob1p and involved in 26S proteasome assembly (similar to PNO1;)
orf_2060	x																																										Predicted pseudouridylate synthase
orf_2061	x																																										DNA repair protein RAD51/RHP55 (similar to RAD51;)
orf_2063	x																																										Vesicle coat complex COPII, subunit SEC23 (similar to SEC23;)
orf_2064		x	x	x	x				x																																		hypothetical protein
orf_2068	x																																										6-phosphogluconolactonase - like protein (similar to SOL4; SOL3; SOL2; SOL1;)
orf_207	x																																										20S proteasome, regulatory subunit beta type PSMB6/PSMB9/PRE3 (similar to PRE3;)
orf_2072	x		x		x																																						Haloacid dehalogenase-like hydrolase (similar to SDT1; PHM8;)
orf_2079	x		x	x	x																																						Molecular chaperone (DnaJ superfamily) (similar to PAM18; MDJ2;)
orf_2080	x																																										Predicted nucleotidyltransferase
orf_2081	x																																										protein containing FY-rich, N-terminal
orf_209	x		x	x	x																																						Transcription elongation factor TFIIS/Cofactor of enhancer-binding protein Sp1 (similar to DST1;)
orf_2091	x																																										hypothetical protein
orf_2092	x																																										protein containing Heat shock protein DnaJ, N-terminal
orf_2093	x																																										hypothetical protein
orf_2095	x																																										Alpha tubulin (similar to TUB3; TUB1;)
orf_2102	x														x			x														x											dUTPase (similar to DUT1;)
orf_2103	x			x		x	x					x				x		x								x																	putative LRR containing protein
orf_2104	x							x		x																																	hypothetical protein
orf_211															x																												hypothetical protein
orf_2110			x	x		x														x																							hypothetical protein
orf_2111						x	x														x																						protein containing Rho GTPase-activating protein domain, Rho GTPase activation protein
orf_2115	x																																										protein containing Peptidase C19, ubiquitin carboxyl-terminal hydrolase 2
orf_212	x																																										Histones H3 and H4 (similar to HHT2; HHT1; CSE4;)
orf_2120	x																																										Apoptosis inhibitor IAP1 and related BIR domain proteins
orf_2121			x	x	x											x		x																									Putative lipase essential for disintegration of autophagic bodies inside the vacuole (similar to ATG15;)
orf_2122	x																																										DNA polymerase delta processivity factor (proliferating cell nuclear antigen) (similar to POL30;)
orf_2131	x		x	x					x		x												x			x								x									hypothetical protein
orf_2138			x	x	x		x		x								x		x		x						x																Transcription initiation factor IIA, gamma subunit (similar to TOA2;)
orf_2139	x																																										Vesicle trafficking protein Sec1 (similar to SEC1;)
orf_214	x		x	x	x	x																				x																	tRNA nucleotidyltransferase/poly(A) polymerase (similar to CCA1;)
orf_2140	x																																										hypothetical protein
orf_2141	x																																										Chromosome condensation complex Condensin, subunit G (similar to YCG1;)
orf_2143	x																																										Ras-related small GTPase, Rho type (similar to RHO5; RHO4; RHO3; RHO2; RHO1; CDC42;)
orf_2146	x																																										Transcription initiation factor TFIID, subunit TAF1
orf_2148	x																																										Cell cycle control protein (crooked neck) (similar to CLF1;)
orf_2155		x																																									Molecular chaperone (HSP90 family) (similar to HSP82; HSC82;)
orf_2157									x							x																											GATA-4/5/6 transcription factors (similar to SRD1; GZF3; GLN3; GAT4; GAT3; ECM23; DAL80;)
orf_2159	x		x	x	x				x																																		Polyadenylate-binding protein (RRM superfamily) (similar to PES4; PAB1; MIP6;)
orf_2160	x				x																																						protein containing Mitochondrial inner membrane translocase complex, subunit Tim17/22
orf_2162	x			x	x	x																																					Ubiquitin-protein ligase (similar to UBC9;)
orf_2164	x																																										hypothetical protein
orf_217			x	x	x				x																																		DNA helicase PIF1/RRM3 (similar to RRM3; PIF1;); Helitron
orf_2172	x																																										hypothetical protein
orf_2175	x		x	x	x			x	x	x						x	x										x		x														tRNA methyltransferase (similar to TRM1;)
orf_2177	x																																										protein containing Protein of unknown function DUF2404, transmembrane
orf_2178	x																																										Predicted E3 ubiquitin ligase (similar to CWC24;)
orf_218	x						x																																				hypothetical protein
orf_2182	x																									x																	tRNA-dihydrouridine synthase (similar to DUS4; DUS1;)
orf_2186		x																																									Diphthamide biosynthesis protein (similar to DPH2; DPH1;)
orf_2187	x				x																																						Decapping enzyme complex, predicted pyrophosphatase DCP2 (similar to DCP2;)
orf_2188																										x	x																hypothetical protein
orf_219	x																																										Serine/threonine protein kinase (similar to IPL1;)
orf_2191	x																																										Histone acetyltransferase SAGA/ADA, catalytic subunit PCAF/GCN5 and related proteins (similar to SPT7; GCN5;)
orf_2194					x				x								x		x																								sn-1,2-diacylglycerol ethanolamine- and cholinephosphotranferases (similar to EPT1; CPT1;)
orf_2195	x																																										nucleoside-triphosphatase; RNA helicase
orf_2196			x		x				x										x																								hypothetical protein
orf_2197	x																																										Predicted translation initiation factor related to eIF-3a
orf_22	x																																										protein containing Heat shock protein DnaJ, N-terminal, Zinc finger, C2H2-like
orf_220					x		x																																				FOG: Predicted E3 ubiquitin ligase (similar to ASR1;)
orf_2200					x																																						Small nuclear ribonucleoprotein (snRNP) LSM3 (similar to LSM3;)
orf_2201	x																																										hypothetical protein
orf_2202	x																																										proline 3-hydroxylase; demethylmenaquinone methyltransferase
orf_2206	x																																										Box H/ACA snoRNP component, involved in ribosomal RNA pseudouridinylation (similar to NHP2;)
orf_221	x																																										Histone deacetylase complex, catalytic component RPD3 (similar to RPD3; HOS2; HOS1;)
orf_2210	x																																										protein containing Metallo-hydrolase/oxidoreductase, Beta-lactamase-like
orf_2211						x	x					x								x	x											x											Predicted aminopeptidase of the M17 family
orf_2213	x		x																																								Cell cycle control protein (similar to LEM3; CDC50;)
orf_2217			x	x	x				x																	x	x																protein containing Signal peptidase complex subunit 2 (similar to SPC2;)
orf_2219	x																																										Exosomal 3'-5' exoribonuclease complex, subunit Rrp4 (similar to RRP4;)
orf_2220		x			x														x								x																Vigilin (similar to SCP160;)
orf_2222													x																														Acyl-CoA synthetase (similar to ACS2; ACS1;)
orf_2224			x	x		x	x	x				x																															hypothetical protein
orf_2225		x																																									hypothetical protein
orf_2227	x			x	x		x		x					x							x																						hypothetical protein
orf_2229	x																																										GTP-binding ADP-ribosylation factor-like protein ARL2 (similar to CIN4;)
orf_2231	x					x	x					x								x	x																						Sirtuin 5 and related class III sirtuins (SIR2 family) (similar to SIR2; HST4; HST3; HST1;)
orf_2233	x																																										RNA polymerase I, second largest subunit (similar to RPA135;)
orf_2237		x																																									hypothetical protein
orf_224	x																																										protein containing Autophagy-related protein 9
orf_2242					x																																						Ubiquitin carboxyl-terminal hydrolase (similar to UBP2; UBP15;); Protein containing Peptidase C19, ubiquitin carboxyl-terminal hydrolase 2
orf_2246	x																																										hypothetical protein
orf_2248		x																																									hypothetical protein
orf_225	x																																										protein containing Tetratricopeptide repeat, Tetratricopeptide-like helical
orf_2254	x																																										Ubiquitin-protein ligase (similar to UBC5; UBC4; UBC13; PEX4;)
orf_2256				x																																							Structure-specific endonuclease ERCC1-XPF, ERCC1 component (similar to RAD10;)
orf_2257	x																																										protein containing Rab-GAP/TBC domain
orf_2258								x		x			x					x											x														Ferric reductase-like proteins (similar to GOT1;)
orf_2259	x								x																																		hypothetical protein
orf_226	x																																										GTPase Rab1/YPT1, small G protein superfamily, and related GTP-binding proteins (similar to YPT1;)
orf_2260	x																																										Fibrillarin and related nucleolar RNA-binding proteins (similar to NOP1;)
orf_2261			x	x	x				x																															x			hypothetical protein
orf_2263	x																																										Spliceosome subunit (similar to LUC7;)
orf_2265	x																					x																					RNAse L inhibitor, ABC superfamily (similar to RLI1;)
orf_2266	x																									x																	Transcription initiation factor IIE, alpha subunit (similar to TFA1;)
orf_227									x																																		tRNA modification enzyme (similar to TRM5;)
orf_2270	x			x																																							protein containing FY-rich, N-terminal
orf_2271	x																																										Long-chain acyl-CoA synthetases (AMP-forming) (similar to FAA2;)
orf_2273	x																																										hypothetical protein
orf_2274		x																																									hypothetical protein
orf_2276	x																																										ATP-dependent RNA helicase (similar to SPB4;)
orf_2277	x																																										60s ribosomal protein L15/L27 (similar to RPL28;)
orf_2278	x																																										RNA helicase; nucleoside-triphosphatase
orf_2279	x				x	x	x													x																							The P-type ATPase (P-ATPase) Superfamily [3.A.6]
orf_228	x		x	x																						x																	Ubiquitin-protein ligase (similar to CDC34;)
orf_2286															x												x																protein containing RNA-directed DNA polymerase (reverse transcriptase); Non LTR Retrotransposon
orf_2295	x																																										40S ribosomal protein S16 (similar to RPS16B; RPS16A;)
orf_2296	x		x																																								60S Ribosomal protein L13 (similar to RPL13B; RPL13A;)
orf_2297			x	x	x																																						hypothetical protein
orf_23	x																																										RNA polymerase, 25-kDa subunit (common to polymerases I, II and III) (similar to RPB5;)
orf_230	x																																										Dolichol kinase (similar to SEC59;)
orf_2301	x																																										hypothetical protein
orf_2302		x																																									hypothetical protein
orf_2306	x																																										The P-type ATPase (P-ATPase) Superfamily [3.A.5]
orf_2310	x																																										hypothetical protein
orf_2311	x																																										Translation initiation factor 4F, helicase subunit (eIF-4A) and related helicases (similar to TIF2; TIF1;)
orf_2314																x																											The Amino Acid/Auxin Permease (AAAP) Family [2.A.19]
orf_2315	x		x	x	x																																						Acetyltransferase, (GNAT) family (similar to NAT3;)
orf_2317			x	x	x	x	x		x			x		x																													hypothetical protein
orf_2318															x																												DHHC-type Zn-finger proteins (similar to PFA5; ERF2;)
orf_2322		x				x	x					x									x																						hypothetical protein
orf_2323			x																																								Translation initiation factor 5A (eIF-5A) (similar to HYP2; ANB1;)
orf_2327	x																																										RNA polymerase II elongator complex, subunit ELP3/histone acetyltransferase (similar to ELP3;)
orf_2331	x																																										DNA repair protein RAD50, ABC-type ATPase/SMC superfamily (similar to RAD50;)
orf_2335	x																																										protein containing Uncharacterised protein family UPF0434/Trm112
orf_2336	x																																										60S ribosomal protein L14/L17/L23 (similar to RPL23B; RPL23A; MRPL38;)
orf_2341	x																																										ATP-dependent RNA helicase (similar to DBP3; DBP2;)
orf_2343	x			x	x																																						20S proteasome, regulatory subunit alpha type PSMA2/PRE8 (similar to PRE8;)
orf_2344	x			x	x							x	x	x					x			x																					20S proteasome, regulatory subunit beta type PSMB3/PUP3 (similar to PUP3;)
orf_235	x				x																																						Ca2+/calmodulin-dependent protein phosphatase (calcineurin subunit B), EF-Hand superfamily protein (similar to CNB1;)
orf_2350	x																																										60S acidic ribosomal protein P2 (similar to RPP2B; RPP2A;)
orf_2354	x																																										hypothetical protein
orf_2356	x																																										hypothetical protein
orf_2357	x																																										hypothetical protein
orf_236	x																																										Predicted GTP-binding protein (ODN superfamily) (similar to YLF2; OLA1;)
orf_2361			x	x	x																																						GTP-binding ADP-ribosylation factor Arf6 (dArf3) (similar to ARF3;)
orf_2362	x																																										Ubiquitin-like protein (similar to HUB1;)
orf_2364	x																																										Component of the U4/U6.U5 snRNP/mitosis protein DIM1 (similar to DIB1;)
orf_2365	x																																										hypothetical protein
orf_2370			x	x	x				x					x					x																								Subtilisin-related protease/Vacuolar protease B (similar to YSP3; PRB1;); Protein containing Proteinase inhibitor I9, subtilisin propeptide
orf_2374			x		x																																						hypothetical protein
orf_2375	x																																										tRNA and rRNA cytosine-C5-methylase (nucleolar protein NOL1/NOP2) (similar to NOP2;)
orf_2376	x																																										Adenosine monophosphate deaminase (similar to AMD1;)
orf_2380	x																																										hypothetical protein
orf_2384	x																																										Mitochondrial Fe/S cluster exporter, ABC superfamily (similar to ATM1;)
orf_2389	x	x																																									hypothetical protein
orf_2392	x																																										Peptidyl-prolyl cis-trans isomerase (similar to CPR8; CPR5; CPR4; CPR2;)
orf_2395		x																																									M-phase inducer phosphatase (similar to MIH1; ARR2;)
orf_2398	x																																										Histone acetyltransferase (MYST family) (similar to SAS3; SAS2; ESA1;)
orf_2400	x																																										Predicted protein involved in nuclear export of pre-ribosomes (similar to NOC2;)
orf_2402	x																																										protein containing Flavodoxin/nitric oxide synthase
orf_2405	x																																										WD40 repeat protein (similar to ENP2;)
orf_241	x																																										ATP-dependent DNA helicase (similar to SGS1;)
orf_2412			x	x	x			x		x																			x														hypothetical protein
orf_2413	x					x	x					x								x	x																						hypothetical protein
orf_2414	x																																										cAMP-dependent protein kinase catalytic subunit (PKA) (similar to TPK3; TPK2; TPK1;)
orf_2415			x	x		x		x		x																	x		x														putative LRR containing protein
orf_2422		x																																									putative LRR containing protein
orf_2427	x																																										Signal peptidase I (similar to SEC11;)
orf_2428	x																																										hypothetical protein
orf_2432	x																																										The Amino Acid/Auxin Permease (AAAP) Family [2.A.18]
orf_2436				x	x				x										x																								hypothetical protein
orf_2440	x																																										hypothetical protein
orf_2442		x																																									protein containing Glycoside hydrolase/deacetylase, beta/alpha-barrel, Polysaccharide deacetylase
orf_2443	x					x	x																																				The ATP-binding Cassette (ABC) Superfamily [3.A.6]
orf_2446	x					x																																					uncharacterised conserved transporter
orf_2449	x				x																																						Vacuolar H+-ATPase V1 sector, subunit H (similar to VMA13;)
orf_245	x																																										Ran-binding protein RANBP1 and related RanBD domain proteins (similar to YRB2; YRB1; NUP2;)
orf_2450	x			x	x									x	x											x																	Chaperonin complex component, TCP-1 beta subunit (CCT2) (similar to CCT2;)
orf_2452	x																																										protein containing Tetratricopeptide repeat, Tetratricopeptide-like helical, Molecular chaperone, heat shock protein, Hsp40, DnaJ
orf_2453			x						x																																		hypothetical protein
orf_2455	x																																										rRNA processing protein (similar to KRR1;)
orf_2460	x																																										hypothetical protein; LTR Retrotransposon
orf_2462		x																																									FOG: Transposon-encoded proteins with TYA, reverse transcriptase, integrase domains in various combinations; LTR Retrotransposon
orf_2465	x																																										Protein phosphatase 1, regulatory subunit, and related proteins (similar to SDS22;)
orf_2469	x					x	x					x				x																											hypothetical protein
orf_2470	x																																										hypothetical protein
orf_2472	x	x																																									Histone H4 (similar to HHF2; HHF1;)
orf_2476	x																																										hypothetical protein
orf_2480					x																																						mRNA capping enzyme, guanylyltransferase (alpha) subunit (similar to CEG1;)
orf_2482	x																																										Protein involved in the nuclear export of pre-ribosomes (similar to NOC3;)
orf_2488	x																																										Zn-finger protein (similar to HOT13;)
orf_2489	x																																										Uncharacterized conserved protein (similar to ESF1;)
orf_2491	x																																										putative transporter
orf_2495	x																																										hypothetical protein
orf_2502			x	x	x				x																																		Predicted metal-dependent hydrolase (beta-lactamase superfamily) (similar to TRZ1;)
orf_2503	x																																										TATA box binding protein (TBP)-associated factor, RNA polymerase II (similar to TAF4;)
orf_2512	x																																										serine C-palmitoyltransferase
orf_2513	x																																										Predicted RNA-binding protein Nob1p involved in 26S proteasome assembly (similar to NOB1;)
orf_2515	x																																										hypothetical protein
orf_2517	x																									x																	non-specific serine/threonine protein kinase
orf_2518	x																																										GTPase Rab6/YPT6/Ryh1, small G protein superfamily (similar to YPT6;)
orf_252		x																																									hypothetical protein
orf_2522	x			x																																							hypothetical protein
orf_2523	x																																										putative transporter
orf_2525			x			x	x		x							x			x																								Pyruvate dehydrogenase E1, beta subunit (similar to PDB1;)
orf_2528		x																																									hypothetical protein
orf_2529		x																																									Transport protein Sec61, alpha subunit (similar to SSH1; SEC61;)
orf_2531	x																																										Phenylalanyl-tRNA synthetase, beta subunit (similar to FRS2;)
orf_2534					x									x													x																SAM-dependent methyltransferase/cell division protein FtsJ (similar to TRM7;)
orf_2535																x																											protein containing UBA/THIF-type NAD/FAD binding fold, NAD(P)-binding domain, Molybdenum cofactor biosynthesis, MoeB
orf_2539	x																																										TATA binding protein associated factor (similar to TAF2;)
orf_254			x	x	x				x		x	x											x				x							x		x							putative LRR containing protein
orf_2540	x				x																																						DNA repair and recombination protein RAD52/RAD22 (similar to RAD59; RAD52;)
orf_2543	x																																										CCAAT-binding factor, subunit C (HAP5) (similar to HAP5;)
orf_2553			x	x		x	x					x	x							x																							hypothetical protein
orf_2556	x																																										hypothetical protein
orf_256	x																																										Cyclin-dependent protein kinase CDC28, regulatory subunit CKS1, and related proteins (similar to CKS1;)
orf_2567		x				x																																					hypothetical protein
orf_2568	x													x																													HVA22/DP1 gene product-related proteins
orf_2569	x																																										Splicing factor U2AF, large subunit (RRM superfamily) (similar to MUD2;)
orf_2573	x																																										40S ribosomal protein S6 (similar to RPS6B; RPS6A;)
orf_2575	x																																										RNA pseudouridylate synthases (similar to RIB2; PUS9; PUS6; PUS5;)
orf_2576					x		x														x									x													protein containing Nucleic acid-binding, OB-fold, Nucleic acid-binding, OB-fold-like
orf_2578	x																					x																					Inosine triphosphate pyrophosphatase (similar to HAM1;)
orf_2579	x																																										ATP-dependent RNA helicase pitchoune (similar to MSS116; HAS1;)
orf_2581	x																																										Inosine triphosphate pyrophosphatase (similar to HAM1;)
orf_2584					x								x			x																											Tyrosyl-tRNA synthetase, cytoplasmic (similar to TYS1;)
orf_2586																										x																	Serine/threonine protein kinase involved in cell cycle control (similar to RIO1;)
orf_2588	x																																										Small Nuclear ribonucleoprotein splicing factor (similar to LSM7;)
orf_2590	x																																										hypothetical protein
orf_2591			x	x	x					x																			x														Serine/threonine protein kinase (similar to BUD32;)
orf_2592	x																																										Phosphatidylinositol synthase (similar to PIS1;)
orf_2593			x	x																																							Cytoskeleton-associated protein and related proteins (similar to NIP100; BIK1;)
orf_2594	x																																										hypothetical protein
orf_2598	x																																										Nuclear pore complex, Nup155 component (D Nup154, sc Nup157/Nup170) (similar to NUP170; NUP157;)
orf_2599	x																																										20S proteasome, regulatory subunit beta type PSMB1/PRE7 (similar to PRE7;)
orf_26	x					x	x		x			x							x	x	x																						hypothetical protein
orf_2600	x																																										Transcription initiation factor TFIID, subunit TAF5 (also component of histone acetyltransferase SAGA) (similar to TAF5;)
orf_2603			x			x			x																		x																putative LRR containing protein
orf_2609	x		x		x				x						x																												Ubiquitin/60s ribosomal protein L40 fusion (similar to RPL40B; RPL40A;)
orf_2610	x	x																																									Ribonucleotide reductase, beta subunit (similar to RNR4; RNR2;)
orf_2611	x																																										Uncharacterized conserved protein (similar to PSF2;)
orf_2612	x																																										Translation initiation factor 5 (eIF-5) (similar to TIF5;)
orf_2613					x																																						Uncharacterized conserved protein (similar to RMD8; RMD1;)
orf_2614	x			x	x									x	x																												hypothetical protein
orf_2615	x																																										methionine---tRNA ligase
orf_2616	x																																										Uncharacterized conserved protein (similar to TFB5;)
orf_2621	x																																										putative LRR containing protein
orf_2622	x																																										protein containing Spc97/Spc98
orf_2623	x																																										5'-3' exonuclease (similar to RAD27;)
orf_2624					x											x																								x			hypothetical protein
orf_2625	x	x																								x																	Glycine/serine hydroxymethyltransferase (similar to SHM2; SHM1;)
orf_2628	x				x									x																										x			Anaphase promoting complex, Cdc20, Cdh1, and Ama1 subunits (similar to CDC20; AMA1;)
orf_2635	x							x		x						x													x								x			x			Chaperonin complex component, TCP-1 theta subunit (CCT8) (similar to CCT8;)
orf_2639	x												x																														SWI/SNF transcription activation complex subunit (similar to SNF12; RSC6;)
orf_264	x																																										hypothetical protein
orf_2646	x																																										RNA polymerase III transcription factor TFIIIC (similar to TFC4;)
orf_2647	x																																										Ribosomal protein RPL1/RPL2/RL4L4 (similar to RPL4B; RPL4A;)
orf_2648	x																																										Signal recognition particle, subunit Srp19 (similar to SEC65;)
orf_265						x	x													x	x									x													hypothetical protein
orf_2650	x																																										Lectin VIP36, involved in the transport of glycoproteins carrying high mannose-type glycans
orf_2652	x																																										hypothetical protein
orf_2655	x		x			x						x								x	x																						protein containing DNA mismatch repair protein MutS, core
orf_266	x								x																																		Membrane component of ER protein translocation complex (similar to SEC62;)
orf_2661	x																																										Nucleotide excision repair complex XPC-HR23B, subunit XPC/DPB11 (similar to RAD4; RAD34;)
orf_2662	x																																										Signal peptidase subunit (similar to SPC1;)
orf_2665	x																																										40S ribosomal protein S21 (similar to RPS21B; RPS21A;)
orf_2667	x																																										hypothetical protein
orf_2669	x																																										The Ca2+:Cation Antiporter (CaCA) Family [2.A.19]
orf_267	x																																										putative transporter
orf_2670	x																																										Spindle pole body protein, contains UNC-84 domain
orf_2671	x																																										60S ribosomal protein L18A (similar to RPL20B; RPL20A;)
orf_2672					x				x					x																													hypothetical protein
orf_2679	x																																										RNA helicase nonsense mRNA reducing factor (pNORF1) (similar to NAM7; ECM32;)
orf_2684	x																																										Ubiquitin-like protein (similar to DSK2;)
orf_2685	x							x		x																			x														protein containing Rad21/Rec8-like protein, C-terminal, Rad21/Rec8-like protein, C-terminal, eukaryotic
orf_2686					x																					x																	hypothetical protein
orf_2687	x																																										hypothetical protein
orf_2688		x																																									The Copper Transporter (Ctr) Family [1.A.56]
orf_2690	x																																										Predicted RNA-binding protein
orf_2699	x																																										hypothetical protein
orf_27	x																																										hypothetical protein
orf_270	x																																										Component of the U4/U6.U5 snRNP/mitosis protein DIM1 (similar to DIB1;)
orf_2700	x																	x																									Ras GTPase-activating protein family - IQGAP (similar to IQG1;)
orf_2701	x				x																																						Cullins (similar to NIC96;)
orf_2702	x		x						x																																		Glycyl-tRNA synthetase and related class II tRNA synthetase (similar to GRS2; GRS1;)
orf_2705	x																																										Argonaute
orf_2711	x												x																														hypothetical protein
orf_2714			x	x	x	x	x													x	x																						hypothetical protein
orf_2715	x				x	x	x	x		x		x								x	x																						uncharacterised conserved transporter
orf_2717			x	x	x				x		x															x	x																hypothetical protein
orf_2719			x	x										x		x		x									x					x											putative LRR containing protein
orf_2722	x																																										Histone transcription regulator HIRA, WD repeat superfamily (similar to HIR2; HIR1;)
orf_2723				x	x	x																				x	x																tRNA splicing endonuclease SEN2 (similar to SEN2;)
orf_2725		x							x																																		hypothetical protein
orf_2727						x	x														x																						hypothetical protein
orf_2728		x	x	x													x		x							x	x																hypothetical protein
orf_2731	x														x	x																											Histones H3 and H4 (similar to HHT2; HHT1; CSE4;)
orf_2733	x																																										26S proteasome regulatory complex, subunit RPN3/PSMD3 (similar to RPN3;)
orf_2735			x			x	x					x									x									x													hypothetical protein
orf_2736		x																																									hypothetical protein
orf_2754	x																																										Ferredoxin/adrenodoxin reductase (similar to ARH1;)
orf_2756	x																																										hypothetical protein
orf_2757	x		x																x																								hypothetical protein
orf_2759						x	x	x		x		x								x	x								x														Translational repressor Pumilio/PUF3 and related RNA-binding proteins (Puf superfamily) (similar to PUF3;)
orf_276	x																																										protein containing Cullin repeat-like-containing domain
orf_2763	x																																										Kinesin-like protein (similar to KIP3; KIP2;)
orf_2765			x	x	x				x																																		protein containing Transcription factor, STE-like (similar to STE12;)
orf_277	x		x		x				x																																		protein containing Heat shock protein DnaJ, N-terminal, Molecular chaperone, Hsp40, DnaJ, Sec63 domain
orf_2772	x																																										putative LRR containing protein
orf_2774	x		x	x	x				x																																		ethanolamine kinase
orf_2776													x																														putative LRR containing protein
orf_2787			x																							x	x																Uracil DNA glycosylase (similar to UNG1;)
orf_2789						x																				x																	The P-type ATPase (P-ATPase) Superfamily [3.A.4]
orf_2791	x		x																							x																	Uncharacterized conserved protein
orf_2795	x																																										DNA helicase PIF1/RRM3 (similar to RRM3; PIF1;); Helitron
orf_2796	x																																										DNA replication licensing factor, MCM2 component (similar to MCM2;)
orf_2797	x																																										Single-stranded DNA-binding replication protein A (RPA), large (70 kD) subunit and related ssDNA-binding proteins (similar to RFA1;)
orf_2798	x																																										ATP-dependent RNA helicase (similar to RRP3;)
orf_2799	x																																										RNA polymerase II transcriptional regulation mediator (similar to MED6;)
orf_28	x																																										hypothetical protein
orf_280				x	x		x	x	x	x		x		x							x																						tRNase Z
orf_2800	x																																										Iron binding protein involved in Fe-S cluster formation (similar to ISU2; ISU1;)
orf_2802				x	x	x			x						x			x	x						x		x																Diphthine synthase (similar to DPH5;)
orf_2803	x	x																																									Chaperone HSP104 and related ATP-dependent Clp proteases (similar to HSP78; HSP104;)
orf_2804			x		x	x	x				x													x																			Aspartyl-tRNA synthetase (similar to DPS1;)
orf_2805	x																																										Predicted RNA polymerase III subunit C17 (similar to RPC17;)
orf_2807	x							x		x			x													x			x														Transport protein particle (TRAPP) complex subunit (similar to TRS23;)
orf_2809																										x																	hypothetical protein
orf_2813	x																									x																	Polyadenylation factor I complex, subunit FIP1 (similar to FIP1;)
orf_2814	x																																										RNA polymerase II subunit 9 (similar to RPB9;)
orf_2815	x					x	x					x								x										x													hypothetical protein
orf_2818	x																																										Putative SAM-dependent rRNA methyltransferase SPB1 (similar to SPB1;)
orf_2819	x																																										hypothetical protein
orf_282	x																																										60S ribosomal protein L5 (similar to RPL5;)
orf_2820	x																			x						x	x																Ribosomal RNA adenine dimethylase
orf_2824	x																																										Uncharacterized proteins of PilT N-term./Vapc superfamily (similar to UTP23;)
orf_2825	x																																										protein containing Zinc finger, C2H2-like
orf_2826	x																																										hypothetical protein
orf_2831	x																																										hypothetical protein
orf_2842	x																																										hypothetical protein
orf_2844	x																																										Predicted exosome subunit (similar to SDO1;)
orf_2845	x		x																																								Ribosomal protein S18 (similar to SWS2; RPS18B; RPS18A;)
orf_2848									x																	x																	hypothetical protein
orf_2858	x		x						x		x						x	x							x		x				x								x				protein containing POPLD, Ribonuclease P/MRP, subunit POP1
orf_2860	x																																										The ATP:ADP Antiporter (AAA) Family [2.A.12]
orf_2864					x																																						20S proteasome, regulatory subunit alpha type PSMA6/SCL1 (similar to SCL1;)
orf_2867				x	x																					x	x																hypothetical protein
orf_2870	x															x																											hypothetical protein
orf_2878		x																																									uncharacterised conserved transporter
orf_2880	x																																										hypothetical protein
orf_2881													x																														tRNA delta(2)-isopentenylpyrophosphate transferase (similar to MOD5;)
orf_2885	x																																										60S ribosomal protein L22 (similar to RPL17B; RPL17A;)
orf_2892	x																																										Vacuolar H+-ATPase V1 sector, subunit D (similar to VMA8;)
orf_2896			x																																								The ATP:ADP Antiporter (AAA) Family [2.A.14]
orf_2897	x		x	x	x				x																																		CCAAT-binding factor, subunit A (HAP3)
orf_2900	x																																										hypothetical protein
orf_2903	x																																										putative transporter
orf_2909	x		x	x	x																																						MOT2 transcription factor (similar to MOT2;)
orf_2910	x																																										20S proteasome, regulatory subunit alpha type PSMA1/PRE5 (similar to PRE5;)
orf_2911	x																									x																	hypothetical protein
orf_2913				x		x	x		x																	x	x																hypothetical protein
orf_2915	x		x						x										x																								Tetraspanin family integral membrane protein
orf_2916	x																																										hypothetical protein
orf_2923	x																																										protein containing Uncharacterised protein family, ATP binding
orf_2924		x																																									hypothetical protein
orf_2925	x																																										Extracellular protein SEL-1 and related proteins (similar to SKT5; SHC1; HRD3; ACK1;)
orf_2926	x																																										ER lumen protein retaining receptor (similar to ERD2;)
orf_2927	x																																										protein containing Bromodomain transcription factor
orf_2929									x																																		FOG: Zn-finger (similar to ZAP1; USV1; SWI5; STP4; STP3; RSF2; RPH1; RME1; RIM101; RGM1; PZF1; NRG2; NRG1; MSN4; MSN2; MIG3; MIG2; MIG1; MET32; MET31; GIS1; FZF1; CRZ1; AZF1; ADR1; ACE2;)
orf_2931	x				x																																						putative transporter
orf_2933		x			x	x	x																			x																	The Monovalent Cation:Proton Antiporter-1 (CPA1) Family [2.A.37]
orf_2936	x				x																																						Translation initiation factor 1 (eIF-1/SUI1) (similar to SUI1;)
orf_2937	x		x	x	x																																						hypothetical protein
orf_2938	x																																										Protein involved in inorganic phosphate transport (similar to PHO88;)
orf_2940	x																																										hypothetical protein
orf_2943																											x																protein containing Endonuclease/exonuclease/phosphatase; Non LTR Retrotransposon
orf_295		x																																									Serine/threonine protein kinase
orf_2952	x																																										60S ribosomal protein L21 (similar to RPL21B; RPL21A;)
orf_2953	x																																										Ribosomal protein S4 (similar to RPS9B; RPS9A;)
orf_2954	x																																										hypothetical protein
orf_2956	x																																										protein containing Abortive infection protein
orf_2959			x	x	x		x		x		x			x												x	x																Predicted hydrolases or acyltransferases (alpha/beta hydrolase superfamily)
orf_296	x				x																					x																	Ran GTPase-activating protein (similar to RNA1;)
orf_2963	x																																										The Sulfate Permease (SulP) Family [2.A.53]
orf_2971	x																																										hypothetical protein
orf_2981	x																																									x	RNA-directed DNA polymerase; Non LTR Retrotransposon
orf_2983	x																																										Beta tubulin (similar to TUB2;)
orf_2986			x																							x																	hypothetical protein
orf_2989					x																																						hypothetical protein
orf_2990			x	x	x	x	x		x			x											x											x									hypothetical protein
orf_2991				x	x																																						protein containing Nucleotide-binding, alpha-beta plait, RNA recognition motif domain
orf_2992	x																																										hypothetical protein
orf_2995	x																																										60s ribosomal protein L34 (similar to RPL34B; RPL34A;)
orf_2996		x																																									HORMA domain (similar to HOP1;)
orf_30	x			x	x																						x																Polyadenylation factor I complex, subunit PFS2 (similar to PFS2;)
orf_300	x																																										WD40 repeat protein
orf_3001		x																																									hypothetical protein
orf_3007										x																																	WD40-like repeat containing protein
orf_3008		x			x			x		x					x						x					x			x			x											hypothetical protein
orf_3010	x												x																														D-Tyr-tRNA (Tyr) deacylase (similar to DTD1;)
orf_3014			x	x		x			x						x	x		x														x											Signal recognition particle receptor, alpha subunit (similar to SRP101;)
orf_302	x																									x																	60S ribosomal protein L30 (similar to RPL30;)
orf_303	x																																										protein containing WD40/YVTN repeat-like-containing domain, WD40 repeat
orf_3030	x					x		x		x											x																						Cysteinyl-tRNA synthetase
orf_3034	x																																										Predicted esterase of the alpha-beta hydrolase superfamily (Neuropathy target esterase), contains cAMP-binding domains (similar to NTE1;)
orf_3038	x																																										Vesicle coat complex COPI, beta subunit (similar to SEC26;)
orf_304	x		x	x	x				x								x		x																								protein containing Ubiquitin-conjugating enzyme/RWD-like
orf_3040	x																																										Structure-specific endonuclease ERCC1-XPF, catalytic component XPF/ERCC4 (similar to RAD1;)
orf_3053	x																																										Vesicle coat complex COPI, beta' subunit (similar to SEC27;)
orf_3054			x	x																																							Predicted GTPase-activating protein (similar to GLO3;)
orf_3057	x																																										Molecular chaperones mortalin/PBP74/GRP75, HSP70 superfamily (similar to SSQ1; ECM10;)
orf_3058	x				x																					x																	hypothetical protein
orf_306	x																																										Cysteine desulfurase NFS1 (similar to NFS1;)
orf_3062			x	x	x				x										x																								40S ribosomal protein S20 (similar to RPS20;)
orf_3070	x																																										protein containing Ubiquitin, Ubiquitin subgroup
orf_3075	x																																									x	protein containing RNA-directed DNA polymerase (reverse transcriptase); Non LTR Retrotransposon
orf_3077	x		x	x	x				x		x						x		x				x	x				x						x		x							Global transcriptional regulator, cell division control protein (similar to SPT16;)
orf_3078	x				x																																						Armadillo/beta-Catenin/plakoglobin (similar to URK1; FUR1; DAS2;)
orf_3085				x				x		x								x								x			x								x						hypothetical protein
orf_3087					x	x	x																																				nucleoside-triphosphatase; RNA helicase
orf_3088	x	x																																									hypothetical protein
orf_3089	x		x		x		x		x				x		x												x																E2F-like protein
orf_3090	x																																										Leucyl-tRNA synthetase (similar to CDC60;)
orf_3091	x																																										Uncharacterized conserved protein
orf_3092					x																																						hypothetical protein
orf_3093		x					x		x			x					x										x																Transcription factor of the Forkhead/HNF3 family (similar to HCM1; FKH2; FKH1; FHL1;)
orf_3095	x																																										DNA repair exonuclease MRE11 (similar to MRE11;)
orf_3096	x		x		x																																						DNA replication factor/protein phosphatase inhibitor SET/SPR-2 (similar to VPS75;)
orf_3098	x																																										Uncharacterized conserved protein (similar to KTI11;)
orf_3100	x																																										NMD protein affecting ribosome stability and mRNA decay (similar to NMD3;)
orf_3106	x																																										Predicted membrane protein (similar to ALE1;)
orf_3107	x																																										Predicted membrane protein (similar to ALE1;)
orf_3109	x																																										Metallopeptidase (similar to MAP2;); Protein containing Peptidase M24, structural domain
orf_311	x																																										26S proteasome regulatory complex, subunit RPN5/PSMD12 (similar to RPN5;)
orf_3111	x		x	x	x																																						Predicted P-loop ATPase fused to an acetyltransferase (similar to KRE33;)
orf_3112	x																																										hypothetical protein
orf_3113	x				x												x	x	x							x														x			hypothetical protein
orf_3114	x		x	x	x				x							x										x	x																Lysyl-tRNA synthetase (class II) (similar to MSK1; KRS1;)
orf_3115			x	x	x				x																																		Ras-related small GTPase, Rho type (similar to RHO5; RHO4; RHO3; RHO2; RHO1; CDC42;)
orf_3116	x																																										protein containing Histone-fold
orf_3119													x																														putative transporter
orf_312	x																																										Ubiquitin activating enzyme UBA1 (similar to UBA1;)
orf_3120	x			x	x		x		x			x														x																	protein containing Actin-binding, cofilin/tropomyosin type
orf_3122	x																																										mRNA cap methyltransferase (similar to ABD1;)
orf_3125			x						x																																		hypothetical protein
orf_3127	x		x						x								x		x																								protein containing Rho GTPase-activating protein domain, Rho GTPase activation protein
orf_3128	x												x		x																												Vesicle coat complex COPII, subunit SEC13 (similar to SEC13;)
orf_3130	x																																										E3 ubiquitin ligase interacting with arginine methyltransferase (similar to GIS2; AIR2; AIR1;)
orf_3131					x	x	x					x				x																											Splicing factor 3b, subunit 2 (similar to CUS1;)
orf_3134	x																																										Glutaminyl-tRNA synthetase (similar to GLN4;)
orf_3137	x						x								x		x																										60S ribosomal protein L22 (similar to RPL22B; RPL22A;)
orf_3140	x		x	x	x																					x	x																hypothetical protein
orf_3142		x																																									hypothetical protein
orf_3143	x			x												x						x																					S-adenosylmethionine synthetase (similar to SAM2; SAM1;)
orf_3145	x				x			x		x																																	Translation initiation factor 4F, ribosome/mRNA-bridging subunit (eIF-4G) (similar to TIF4632; TIF4631;)
orf_3146	x																																										The Major Facilitator Superfamily (MFS) [2.A.1]
orf_315					x																																						The Major Facilitator Superfamily (MFS) [2.A.1]
orf_3150						x	x														x																						Choline phosphate cytidylyltransferase/Predicted CDP-ethanolamine synthase (similar to MUQ1;)
orf_3151																x																											Dolichyl-phosphate-mannose:protein O-mannosyl transferase (similar to PMT6; PMT5; PMT4; PMT3; PMT2; PMT1;)
orf_3156	x																																										Protease, Ulp1 family (similar to ULP1;): Protein containing Peptidase C48, SUMO/Sentrin/Ubl1
orf_3158		x	x	x	x	x	x		x			x								x	x						x			x													The ATP-binding Cassette (ABC) Superfamily [3.A.5]
orf_3159	x																																										hypothetical protein
orf_316		x																																									putative LRR containing protein
orf_3160	x																																										Regulator of ribosome synthesis (similar to RRS1;)
orf_3168		x																																									hypothetical protein
orf_3170	x																																										The Major Facilitator Superfamily (MFS) [2.A.1]
orf_3171					x	x																																					The Major Facilitator Superfamily (MFS) [2.A.1]
orf_3172					x								x																														Gamma-glutamylcysteine synthetase (similar to GSH1;)
orf_3173					x																																						hypothetical protein
orf_3174		x																																									hypothetical protein
orf_3175	x																																										putative LRR containing protein
orf_3176	x																																										Queuine-tRNA ribosyltransferase
orf_3177		x	x	x	x	x			x																															x			hypothetical protein
orf_3178					x																																						Mitotic checkpoint protein MAD1 (similar to MAD1;)
orf_318	x																																										GTP-binding protein DRG2 (ODN superfamily) (similar to RBG2;)
orf_3180				x	x																																						hypothetical protein
orf_3182			x	x	x											x																											protein containing Sec20
orf_3186	x	x	x		x	x	x									x																											Molecular chaperones HSP105/HSP110/SSE1, HSP70 superfamily (similar to SSE2; SSE1;)
orf_3188						x	x					x									x																						hypothetical protein
orf_3189	x																																										Serine/threonine specific protein phosphatase involved in glycogen accumulation, PP2A-related (similar to PPH3; PPG1;)
orf_319	x			x	x								x									x				x	x		x														DNA replication licensing factor, MCM7 component (similar to MCM7;)
orf_3192																								x				x															putative transposable element encoded protein
orf_3193		x		x	x																						x																hypothetical protein
orf_3195																										x																	protein containing Homeodomain-like
orf_32	x																																										hypothetical protein
orf_320																										x																	Chaperonin complex component, TCP-1 alpha subunit (CCT1) (similar to TCP1;)
orf_3203	x																																										hypothetical protein
orf_3205	x																																										hypothetical protein
orf_3212			x	x	x																																						hypothetical protein
orf_3213	x																																										Prenylated rab acceptor 1 (similar to YIP3;)
orf_3215	x																																										RAB proteins geranylgeranyltransferase component A (RAB escort protein) (similar to MRS6; GDI1;)
orf_3216	x																																										Uncharacterized conserved protein (similar to TSR1;)
orf_3219		x			x	x	x					x									x																						putative LRR containing protein
orf_322	x																																										protein containing Histone-fold
orf_3223	x		x	x	x																		x			x																	DNA replication licensing factor, MCM4 component (similar to MCM4;)
orf_3224																											x																hypothetical protein
orf_3225	x				x	x			x																																		putative LRR containing protein
orf_3227					x				x					x				x				x																					hypothetical protein
orf_3228								x		x																			x														RasGAP SH3 binding protein rasputin, contains NTF2 and RRM domains (similar to BRE5;)
orf_3229	x			x	x				x				x	x																													Vesicle coat complex COPII, subunit SEC24/subunit SFB2 (similar to SFB2; SEC24;)
orf_3230	x		x	x																							x																AAA+-type ATPase (similar to CDC48; AFG2;)
orf_3231			x	x		x	x					x																															protein containing Vacuolar (H+)-ATPase G subunit
orf_3232	x																																										Casein kinase II, alpha subunit (similar to CKA2; CKA1;)
orf_3234		x		x	x	x			x			x	x	x																													hypothetical protein
orf_3235		x	x	x	x						x												x											x									hypothetical protein
orf_3240			x					x	x	x			x													x			x														Helicase of the DEAD superfamily
orf_3241	x					x	x					x								x	x									x													Molecular chaperone (HSP90 family) (similar to HSP82; HSC82;)
orf_3243		x																																									hypothetical protein
orf_3245	x																																										Glycosylphosphatidylinositol anchor synthesis protein (similar to GPI13;)
orf_3246	x															x																											Protein geranylgeranyltransferase type II, alpha subunit (similar to BET4;)
orf_3249					x																																						hypothetical protein
orf_3250		x		x	x										x						x											x											hypothetical protein
orf_3251	x																																										Predicted membrane protein (similar to DFM1; DER1;)
orf_3253	x																																										phosphate-transporting ATPase
orf_3256	x																																										RAB proteins geranylgeranyltransferase component A (RAB escort protein) (similar to MRS6; GDI1;)
orf_3257	x																																										protein containing DNA-dependent ATPase MCM, Nucleic acid-binding, OB-fold, ATPase, AAA+ type, core
orf_3259	x																																										hypothetical protein
orf_3260	x				x																																						hypothetical protein
orf_3261	x																																										Protein kinase PCTAIRE and related kinases (similar to PHO85; CDC28; CAK1;)
orf_3264					x				x																																		hypothetical protein
orf_3265	x																																										Chaperonin complex component, TCP-1 gamma subunit (CCT3) (similar to CCT3;)
orf_3267	x																																										Serine/threonine phosphatase 2C containing leucine-rich repeats, similar to SCN circadian oscillatory protein (SCOP) (similar to CYR1;)
orf_3268	x																									x																	RNA polymerase III, subunit C34 (similar to RPC34;)
orf_3269	x																																										Predicted phosphate acyltransferase, contains PlsC domain
orf_3270			x	x					x																	x	x																Sterol O-acyltransferase/Diacylglycerol O-acyltransferase (similar to ARE2; ARE1;)
orf_3271	x		x	x	x				x																																		protein containing Pleckstrin homology-type, Oxysterol-binding protein, Pleckstrin homology domain
orf_3273	x																																										hypothetical protein
orf_3280																					x																						CCCH-type Zn-finger protein (similar to TIS11;)
orf_3281		x			x																																						hypothetical protein
orf_3284	x		x	x	x																																						Uncharacterized conserved protein
orf_3286	x		x	x	x	x																																					hypothetical protein
orf_3287				x																																							D-ribulose-5-phosphate 3-epimerase (similar to RPE1;)
orf_3288	x																																										Sec5 subunit of exocyst complex (similar to SEC5;)
orf_3289	x																																										hypothetical protein
orf_3292	x																																										Chromatin remodeling protein HARP/SMARCAL1, DEAD-box superfamily
orf_3296	x																																										Pseudouridylate synthase (similar to DEG1;)
orf_330		x																																									hypothetical protein
orf_332		x							x						x			x														x											hypothetical protein
orf_334	x		x	x					x					x																													hypothetical protein
orf_335				x										x																													Endonuclease III (similar to NTG2; NTG1;)
orf_34	x																																										mRNA splicing protein CDC5 (Myb superfamily) (similar to CEF1;)
orf_342	x																									x																	GTPase Ran/TC4/GSP1 (nuclear protein transport pathway), small G protein superfamily (similar to GSP2; GSP1;)
orf_343	x																																										tRNA-dihydrouridine synthase (similar to DUS4; DUS1;)
orf_346			x	x																						x																	Ypt/Rab-specific GTPase-activating protein GYP1 (similar to GYP1;)
orf_352			x	x	x				x																																		putative LRR containing protein
orf_353																								x	x		x																putative transposable element encoded protein
orf_354		x																																									hypothetical protein
orf_356		x		x	x				x					x																													hypothetical protein
orf_361	x																									x																	Similar to bacterial dephospho-CoA kinase
orf_363	x																																										hypothetical protein
orf_366																										x																	hypothetical protein
orf_368	x																																										hypothetical protein
orf_370	x																																										hypothetical protein
orf_371	x																																										Ferredoxin (similar to YAH1;)
orf_373	x												x																														Predicted methyltransferase (similar to ABP140;)
orf_374	x		x	x																																							60S ribosomal protein L13a (similar to RPL16B; RPL16A;)
orf_375	x																																										60S ribosomal protein L32 (similar to RPL32;)
orf_377				x	x	x	x		x			x		x				x			x	x				x																	protein containing DNA repair protein, Swi5
orf_378	x																																										Inositol-1,4,5-triphosphate 5-phosphatase (synaptojanin), INP51/INP52/INP53 family (similar to INP53; INP52; INP51;)
orf_386					x																						x																RNA polymerase III subunit C11 (similar to RPC11;)
orf_387	x	x		x	x											x																											Molecular chaperones HSP70/HSC70, HSP70 superfamily (similar to SSZ1; SSB2; SSA4; SSA3; SSA2; SSA1;)
orf_389	x																									x																	26S proteasome regulatory complex, subunit RPN7/PSMD6 (similar to RPN7;)
orf_390	x																																										FOG: RRM domain (similar to WHI4; WHI3; TIF3; SBP1; RIM4; PUB1; NOP12; NGR1; NAM8; NAB6; NAB3; MUD1; MRN1; LHP1; HRB1; GBP2; CWC2;)
orf_391	x																																										hypothetical protein
orf_392	x				x																																			x			protein containing Brix domain
orf_394	x		x	x	x				x																																		40s ribosomal protein s10 (similar to RPS10B; RPS10A;)
orf_402					x																																						Polycomb enhancer protein, EPC (similar to EPL1;)
orf_403	x																																										Uncharacterized conserved protein (similar to IES6;)
orf_406	x			x	x																																						ATP-dependent DNA ligase I (similar to CDC9;)
orf_414	x																																										tRNA-binding protein (similar to ARC1;)
orf_416	x		x	x	x																																						Nuclear protein export factor (similar to SAC3;)
orf_419	x																																										Translation elongation factor EF-1 alpha/Tu (similar to TEF2; TEF1;)
orf_421	x				x										x			x							x							x											putative LRR containing protein
orf_427		x	x	x	x	x	x		x						x						x																						hypothetical protein
orf_431	x		x						x																	x																	RNA helicase BRR2, DEAD-box superfamily (similar to BRR2;)
orf_432	x																																										RNA helicase (Hel)
orf_436		x																																									The Monovalent Cation:Proton Antiporter-1 (CPA1) Family [2.A.36]
orf_44	x		x		x																					x																	uncharacterised conserved transporter
orf_441	x																																										Molecular chaperone (DnaJ superfamily)
orf_442				x	x																																						Nuclear pore complex, rNpl4 component (sc Npl4) (similar to NPL4;)
orf_443	x	x																																									Hexokinase (similar to HXK2; HXK1; GLK1; EMI2;)
orf_45	x																																										Molecular chaperone (DnaJ superfamily) (similar to SIS1; JJJ3; JJJ2; HLJ1;)
orf_452	x																																										protein containing Translation protein SH3-like, subgroup
orf_453		x																																									putative LRR containing protein
orf_459	x																																										40S ribosomal protein S8 (similar to RPS8B; RPS8A;)
orf_46																						x																					Polyadenylation factor I complex, subunit, Yth1 (CPSF subunit) (similar to YTH1;)
orf_460	x																																										Biotin holocarboxylase synthetase/biotin-protein ligase (similar to BPL1;)
orf_462	x																																										ATP-dependent RNA helicase (similar to SUB2;)
orf_47		x																																									hypothetical protein
orf_470	x																																										protein containing High mobility group, HMG1/HMG2, High mobility group, superfamily
orf_473								x		x																			x														hypothetical protein
orf_475	x																																										Protein involved in meiotic recombination/predicted coiled-coil protein (similar to MND1;)
orf_476	x																																										Phosphorylcholine transferase/cholinephosphate cytidylyltransferase (similar to PCT1;)
orf_479			x	x	x																																						Divalent cation tolerance-related protein
orf_48	x																																										Farnesyl cysteine-carboxyl methyltransferase (similar to STE14;)
orf_480	x																																										Phosphatidylinositol transfer protein
orf_484	x																																										hypothetical protein
orf_490	x																																										DNA repair protein RAD18 (SMC family protein) (similar to SMC6;)
orf_494					x		x		x																																		hypothetical protein
orf_498	x																																										protein containing DNA-binding SAP
orf_499	x				x										x		x		x																								Small nuclear ribonucleoprotein Sm D3 (similar to SMD3;)
orf_5	x																																										hypothetical protein
orf_50	x		x						x																												x						Uncharacterized membrane protein
orf_500					x										x				x																								hypothetical protein
orf_504	x								x						x											x																	SNARE protein Syntaxin 18/UFE1 (similar to UFE1;)
orf_505	x																																										hypothetical protein
orf_510	x																									x																	Vesicle trafficking protein Sly1 (Sec1 family) (similar to SLY1;)
orf_512		x																																									hypothetical protein
orf_517	x																																										protein containing C2H2-type/integrase, DNA-binding, Zinc finger
orf_518			x		x				x				x	x												x																	hypothetical protein
orf_519	x			x	x									x																													Multifunctional chaperone (14-3-3 family) (similar to BMH2; BMH1;)
orf_520	x			x	x																																						protein containing CAP domain
orf_522	x																																										uncharacterised conserved transporter
orf_523	x																																										Ubiquitin-like/40S ribosomal S30 protein fusion (similar to RPS30B; RPS30A;)
orf_524	x																																										The Small Conductance Mechanosensitive Ion Channel (MscS) Family [1.A.23]
orf_525									x																																		hypothetical protein
orf_526	x																																										Glutaredoxin and related proteins (similar to PRM4; GRX8; GRX7; GRX6; GRX2; GRX1;)
orf_527						x	x					x									x									x													The Small Conductance Mechanosensitive Ion Channel (MscS) Family [1.A.23]
orf_528	x		x	x	x																						x																RNA polymerase II transcription initiation factor TFIIA, large chain (similar to TOA1;)
orf_536	x																									x																	protein containing Prefoldin beta-like
orf_538	x																																										hypothetical protein
orf_54															x			x	x													x											H/ACA small nucleolar RNP component GAR1 (similar to GAR1;)
orf_543	x			x	x			x		x			x																x														hypothetical protein
orf_544	x																																										hypothetical protein
orf_546	x															x																											Calponin (similar to SCP1;)
orf_549						x	x	x		x		x									x																						hypothetical protein
orf_55	x																																										Rho-associated, coiled-coil containing protein kinase
orf_555	x			x	x																																						Deoxyhypusine synthase (similar to DYS1;)
orf_562			x	x	x	x																				x																	Phosphatidylinositol 3-kinase VPS34, involved in signal transduction (similar to VPS34;)
orf_563	x																																										GTP-binding protein DRG1 (ODN superfamily) (similar to RBG1;)
orf_565	x																																										protein containing WD40 repeat-like-containing domain, Cleavage/polyadenylation specificity factor, A subunit, C-terminal
orf_566	x		x		x				x									x							x	x																	Protein DRE2, required for cell viability (similar to DRE2;)
orf_567	x																																										hypothetical protein
orf_569	x																																										Nuclear transport receptor RANBP7/RANBP8 (importin beta superfamily) (similar to SXM1; NMD5;)
orf_570															x			x														x											WD40 repeat protein
orf_572	x																																										Ribosomal protein S6 kinase and related proteins (similar to YPK2; SCH9;)
orf_576	x																																										Alanyl-tRNA synthetase (similar to ALA1;)
orf_577	x			x	x	x			x			x								x	x									x										x			hypothetical protein
orf_578	x				x																																						RNA polymerase subunit K (similar to RPO26;)
orf_580									x									x							x		x																The H+- or Na+-translocating F-type, V-type and A-type ATPase (F-ATPase) Superfamily [3.A.2]
orf_583	x																																										Cdc4 and related F-box and WD-40 proteins (similar to UFO1; MET30; CDC4;)
orf_585	x		x	x	x	x	x		x			x				x				x	x																						hypothetical protein
orf_590	x																																										AAA+-type ATPase (similar to YTA6; SAP1;)
orf_591	x																																										hypothetical protein
orf_592	x																																										Proliferation-associated nucleolar protein (NOL1)
orf_593	x				x			x		x																x			x														FOG: RRM domain (similar to WHI4; WHI3; TIF3; SBP1; RIM4; PUB1; NOP12; NGR1; NAM8; NAB6; NAB3; MUD1; MRN1; LHP1; HRB1; GBP2; CWC2;)
orf_595	x												x																														Histone deacetylase complex, catalytic component RPD3 (similar to RPD3; HOS2; HOS1;)
orf_597	x																																										40S ribosomal protein S3 (similar to RPS3;)
orf_599													x																														hypothetical protein
orf_6	x																																										uncharacterised conserved transporter
orf_600	x																																										hypothetical protein
orf_603	x																																										hypothetical protein
orf_607	x		x	x	x																					x																	protein containing Ribonuclease P/MRP protein subunit
orf_608	x																																										FOG: Zn-finger (similar to ZAP1; USV1; SWI5; STP4; STP3; RSF2; RPH1; RME1; RIM101; RGM1; PZF1; NRG2; NRG1; MSN4; MSN2; MIG3; MIG2; MIG1; MET32; MET31; GIS1; FZF1; CRZ1; AZF1; ADR1; ACE2;)
orf_609	x																																										40S ribosomal protein S28 (similar to RPS28B; RPS28A;)
orf_610	x																																										hypothetical protein
orf_611	x																																										hypothetical protein
orf_613	x																																										Histone acetyltransferase (MYST family) (similar to SAS3; SAS2; ESA1;)
orf_614	x																																										Protein involved in DNA repair (similar to MMS21;)
orf_615	x																																										hypothetical protein
orf_62	x																																										RNA polymerase II transcription elongation factor Elongin/SIII, subunit elongin C (similar to ELC1;)
orf_620	x																																										60S ribosomal protein L36 (similar to RPL36B; RPL36A;)
orf_622																										x																	Serine palmitoyltransferase (similar to LCB1;)
orf_625		x																																									Thioredoxin/protein disulfide isomerase (similar to MPD2; MPD1; EPS1;)
orf_626					x																																						hypothetical protein
orf_628			x	x	x				x																	x	x																protein containing Zinc finger, AN1-type
orf_629	x																																										40S ribosomal protein S17 (similar to RPS17B; RPS17A;)
orf_63					x																					x																	Protein interacting with poly(A)-binding protein (similar to PBP1;)
orf_631						x																																					hypothetical protein
orf_635	x																																										hypothetical protein
orf_636					x	x	x					x			x	x					x																						putative LRR containing protein
orf_64	x		x					x	x	x																			x														RNA polymerase, subunit L (similar to RPB11;)
orf_643	x																																										N-arginine dibasic convertase NRD1 and related Zn2+-dependent endopeptidases, insulinase superfamily (similar to STE23; AXL1;)
orf_646	x	x																																									Ubiquitin-like protein (similar to DSK2;)
orf_650	x																																										Golgi protein (similar to VPS74;)
orf_657					x																																						hypothetical protein
orf_658	x																																										26S proteasome regulatory complex, ATPase RPT6 (similar to RPT6;)
orf_660			x		x				x		x																																ubiquitin thiolesterase; ubiquitinyl hydrolase 1; Protein containing Peptidase C19, ubiquitin carboxyl-terminal hydrolase 2
orf_662		x																	x																								hypothetical protein
orf_663			x	x																																							hypothetical protein
orf_664		x			x																																						hypothetical protein
orf_668						x	x													x							x																hypothetical protein
orf_672	x																																										cyanophycin synthase (L-arginine-adding)
orf_678	x		x	x	x				x		x								x				x											x									mRNA cleavage and polyadenylation factor I complex, subunit RNA14 (similar to RNA14;)
orf_68									x																																		hypothetical protein
orf_684																			x								x																protein containing Armadillo-type fold, Armadillo-like helical
orf_687					x																																						Extracellular protein SEL-1 and related proteins (similar to SKT5; SHC1; HRD3; ACK1;)
orf_688	x																																										Predicted nucleic-acid-binding protein, contains PIN domain (similar to FCF1;)
orf_689		x																																									Fructose-biphosphate aldolase
orf_690	x																																										protein containing Nucleotide-binding, alpha-beta plait, RNA recognition motif domain
orf_691			x		x																																						hypothetical protein
orf_692	x		x	x	x			x		x			x		x																	x											Vesicle coat complex COPI, gamma subunit (similar to SEC21;)
orf_693																x																											hypothetical protein
orf_695	x																																										hypothetical protein
orf_698		x																																									putative LRR containing protein
orf_699	x		x																																								hypothetical protein
orf_7	x																																										hypothetical protein
orf_70	x																																										hypothetical protein
orf_700																										x	x																The Drug/Metabolite Transporter (DMT) Superfamily [2.A.7]
orf_702	x																																										putative transporter
orf_704																x																											Exosome 3'-5' exoribonuclease complex, subunit PM/SCL-100 (Rrp6) (similar to RRP6;)
orf_705	x			x	x					x																			x														Polyadenylation factor I complex, subunit, Yth1 (CPSF subunit) (similar to YTH1;)
orf_707	x																																										Heterochromatin-associated protein HP1 and related CHROMO domain proteins
orf_708	x																																										Long-chain acyl-CoA synthetases (AMP-forming) (similar to FAA2;)
orf_71			x	x																						x																	26S proteasome regulatory complex, subunit RPN10/PSMD4 (similar to RPN10;)
orf_713	x			x	x				x					x																													protein containing Protein of unknown function DUF2439
orf_717							x																			x																	hypothetical protein
orf_72					x																																						protein containing Arrestin-like, N-terminal
orf_720	x																																										DNA-directed RNA polymerase, subunit RPB10 (similar to RPB10;)
orf_722	x																																										cAMP-dependent protein kinase types I and II, regulatory subunit (similar to BCY1;)
orf_723							x																			x																	protein containing bZIP transcription factor
orf_725																										x																	Ras-related small GTPase, Rho type (similar to RHO5; RHO4; RHO3; RHO2; RHO1; CDC42;)
orf_727	x																																										Transcription initiation factor IIF, auxiliary subunit (similar to YAF9; TAF14; SAS5;)
orf_728						x	x														x																						Predicted RING-containing E3 ubiquitin ligase
orf_738																					x					x																	Anaphase promoting complex, Cdc20, Cdh1, and Ama1 subunits (similar to CDC20; AMA1;)
orf_74					x																																						40S ribosomal protein S13 (similar to RPS13;)
orf_742				x																																							hypothetical protein
orf_745			x	x	x				x																																		hypothetical protein
orf_747	x																																										Ribosomal protein S7 (similar to RSM7; RPS5;)
orf_749					x																																						hypothetical protein
orf_75	x		x	x					x		x						x						x	x							x		x	x		x			x			x	Heat shock transcription factor (similar to SKN7; SFL1; MGA1; HSF1; HMS2;)
orf_751	x			x	x																						x																60s ribosomal protein L10 (similar to RPL10;)
orf_753	x																																										Nuclear distribution protein NUDC
orf_754				x		x		x	x	x								x				x																					hypothetical protein
orf_758	x																																										Transcription initiation factor TFIID, subunit TAF9 (also component of histone acetyltransferase SAGA) (similar to TAF9;)
orf_760	x																																										protein containing Rossmann-like alpha/beta/alpha sandwich fold, Domain of unknown function DUF71, ATP-binding domain
orf_761			x						x						x			x																									putative transporter
orf_762	x																																										20S proteasome, regulatory subunit beta type PSMB4/PRE4 (similar to PRE4;)
orf_763			x																							x																	Predicted RNA methylase
orf_764							x											x																									Dehydrogenases with different specificities (related to short-chain alcohol dehydrogenases)
orf_766									x				x																														Glucose-6-phosphate 1-dehydrogenase (similar to ZWF1;)
orf_771			x	x	x	x																					x																GTP-binding ADP-ribosylation factor Arf1 (similar to ARF2; ARF1;)
orf_772	x																																										26S proteasome regulatory complex, ATPase RPT3 (similar to RPT3;)
orf_777	x				x																																						hypothetical protein
orf_778	x					x	x																																				Pleiotropic regulator 1 (similar to PRP46;)
orf_78	x																																										Ubiquitin-protein ligase (similar to UBC5; UBC4; UBC13; PEX4;)
orf_781				x																																							GTPase Rab5/YPT51 and related small G protein superfamily GTPases (similar to YPT53; YPT52; YPT10; VPS21;)
orf_783	x																																										hypothetical protein
orf_785	x																																										Gamma tubulin (similar to TUB4;)
orf_786	x																																										hypothetical protein
orf_788	x		x	x																																							Golgi proteins involved in ER retention (RER) (similar to RER1;)
orf_789	x																																										RNA polymerase II, fourth largest subunit (similar to RPB4;)
orf_791	x																																										Gpi-anchor transamidase (similar to GPI8;); Protein containing Peptidase C13, legumain
orf_792	x																																										The Drug/Metabolite Transporter (DMT) Superfamily [2.A.7]
orf_793		x																																									non-specific serine/threonine protein kinase; protein kinase C
orf_794		x																																									protein containing Prokaryotic chromosome segregation/condensation protein ScpA
orf_795	x																																										8-oxoguanine DNA glycosylase (similar to OGG1;)
orf_796						x	x	x		x						x													x														DNA polymerase alpha-primase complex, polymerase-associated subunit B (similar to POL12;)
orf_798	x					x	x					x									x																						hypothetical protein
orf_799			x			x	x													x																							The Drug/Metabolite Transporter (DMT) Superfamily [2.A.8]
orf_800	x																		x																								DNA replication licensing factor, MCM3 component (similar to MCM3;)
orf_801	x																																										Dynein light chain type 1 (similar to DYN2;)
orf_804	x																																										U1 snRNP component (similar to SMB1;)
orf_808																x																											Ribosome Assembly protein (similar to RRB1;)
orf_808	x																																										Ribosome Assembly protein (similar to RRB1;)
orf_810	x																																										DNA-directed DNA polymerase
orf_818		x																																									hypothetical protein
orf_82		x																																									hypothetical protein
orf_820	x																																										protein containing GWT1
orf_825	x																																										protein containing PRP38
orf_826																										x																	Ferritin
orf_828	x																																										hypothetical protein
orf_830	x														x																												Molecular chaperone (DnaJ superfamily) (similar to YDJ1; XDJ1; SCJ1; APJ1;)
orf_831	x																																										Transcription initiation factor TFIIIB, Bdp1 subunit (similar to BDP1;)
orf_838	x																																										hypothetical protein
orf_839	x																																										RNA helicase
orf_841	x																																										SCF ubiquitin ligase, Skp1 component (similar to SKP1;)
orf_846	x																																										Nucleoside diphosphate kinase (similar to YNK1;)
orf_848	x																																										hypothetical protein
orf_849					x																																						Histone H3 (Lys4) methyltransferase complex, subunit CPS60/ASH2/BRE2 (similar to BRE2;)
orf_852		x																																									hypothetical protein
orf_854		x																																									hypothetical protein
orf_857					x									x												x																	protein containing Ras small GTPase, Ras type, Ras small GTPase, Rab type, Small GTP-binding protein, Ras GTPase, Ras, Small GTPase, Rho type, Ran GTPase
orf_858	x																																										protein containing Ankyrin repeat-containing domain, Ankyrin repeat
orf_859	x																																										Phosphotyrosyl phosphatase activator (similar to RRD2; RRD1;)
orf_863	x																																										Protein phosphatase 2A regulatory subunit A and related proteins (similar to TPD3;)
orf_864	x																																										Protein kinase of the PI-3 kinase family involved in mitotic growth, DNA repair and meiotic recombination (similar to MEC1;)
orf_866	x																																										Poly(A) polymerase and related nucleotidyltransferases
orf_868	x			x	x				x					x																													Predicted protein carboxyl methylase (similar to BUD23;)
orf_870	x																																										hypothetical protein
orf_876		x				x	x					x																															Haloacid dehalogenase-like hydrolase (similar to SDT1; PHM8;)
orf_877	x																																										TFIIF-interacting CTD phosphatases, including NLI-interacting factor (similar to FCP1;)
orf_880	x				x			x		x									x																								Transcription elongation factor SPT4 (similar to SPT4;)
orf_881	x				x											x																											protein containing Emp24/Gp25L/p24
orf_884	x					x	x																																				hypothetical protein
orf_889									x																																		hypothetical protein
orf_89		x																																									hypothetical protein
orf_892								x		x																x																	protein containing Rho GTPase-activating protein domain, Rho GTPase activation protein
orf_894			x						x																		x																dUTPase (similar to DUT1;)
orf_895	x																																										protein containing Protein of unknown function DUF2404, transmembrane
orf_896	x				x																																						Mitotic spindle checkpoint protein BUB3, WD repeat superfamily (similar to BUB3;)
orf_898	x																																										Hexokinase (similar to HXK2; HXK1; GLK1; EMI2;)
orf_904																x																											CTP synthase (UTP-ammonia lyase) (similar to URA8; URA7;)
orf_905	x																																										Xaa-Pro aminopeptidase (similar to FRA1;); Protein containing Peptidase M24, structural domain
orf_909	x																																										hypothetical protein
orf_91				x	x			x		x																			x														Phosphomannomutase (similar to SEC53;)
orf_910	x																																										Predicted mRNA cap-binding protein related to eIF-4E
orf_914						x	x		x			x			x						x							x															Glutaredoxin and related proteins (similar to PRM4; GRX8; GRX7; GRX6; GRX2; GRX1;)
orf_916	x																																										hypothetical protein
orf_917	x																																										protein containing WD40 repeat, subgroup, WD40/YVTN repeat-like-containing domain
orf_921			x	x	x				x							x										x	x																Isoleucyl-tRNA synthetase (similar to ILS1;)
orf_922				x	x	x	x					x		x							x																						hypothetical protein
orf_923												x						x	x			x																					hypothetical protein
orf_924	x																																										RING-finger-containing E3 ubiquitin ligase
orf_926			x																																								40S ribosomal protein S14 (similar to RPS14B; RPS14A;)
orf_926	x				x																																						40S ribosomal protein S14 (similar to RPS14B; RPS14A;)
orf_929			x	x	x									x												x																	hypothetical protein
orf_937		x																																									Hexokinase (similar to HXK2; HXK1; GLK1; EMI2;)
orf_939	x																										x																Ribonuclease HI (similar to RNH201;)
orf_941	x																																										RNA-directed DNA polymerase; Non LTR Retrotransposon
orf_957		x																																									hypothetical protein
orf_96	x																																										40S ribosomal protein S3A (similar to RPS1B; RPS1A;)
orf_966		x																																									hypothetical protein
orf_967		x																																									hypothetical protein
orf_97										x																			x														hypothetical protein
orf_970				x									x																														hypothetical protein
orf_979							x																																				uncharacterised conserved transporter
orf_98	x					x	x					x				x				x	x									x													Diphthamide biosynthesis protein (similar to DPH2; DPH1;)
orf_980	x																																										Glycine/serine hydroxymethyltransferase (similar to SHM2; SHM1;)
orf_983	x																	x																									protein containing DENN
orf_984	x																																										Predicted metalloprotease with chaperone activity (RNAse H/HSP70 fold) (similar to KAE1;); Protein containing Peptidase M22, glycoprotease
orf_99			x	x	x	x			x																	x																	hypothetical protein
orf_998	x																																										Structural maintenance of chromosome protein 3 (sister chromatid cohesion complex Cohesin, subunit SMC3) (similar to SMC3;)
orf_999					x																																						Molybdopterin synthase sulfurylase (similar to UBA4;)
