# Supplementary material for: The Genome of the Obligate Intracellular Parasite Trachipleistophora hominis: New Insights into Microsporidian Genome Dynamics and Reductive Evolution
Source: PLoS Pathog. 2012 Oct 25;8(10):e1002979. doi: 10.1371/journal.ppat.1002979 (PMC3486916; doi:10.1371/journal.ppat.1002979)
Supplement: Table S5 — Putative regulatory motifs detected by MEME in the intergenic regions of T. hominis, provided as regular expressions, and putative transcription factors for some motifs (Figure 2). (XLS) [file ppat.1002979.s021.xls]

## Sheet: T5
Supplementary Table 5: Potential regulatory motifs detected by MEME in the intergenic regions of T. hominis. The significance (e-value), number of sites detected and the width of the motif are provided.The detected motifs were searched against known transcription factor binding sites with the TOMTOM suite, and the 6 significant hits against the three databases included in the TOMTOM search are gi…						JASPAR_CORE_2009.meme (476 motifs	transfac_matrix.meme (1226 motifs)	uniprobe_mouse.meme (386 motifs)
motif	pattern	e-value	sites	width	motif figure	motifs matched	motifs matched	motifs matched	best hit	alt. name	q-value	transcription factor in T. hominis
ccc'	AAA[TA][TA][TC]TT[TG][AT]ACCC[CT]	7.9E-043	977	15	Figure 2
1	TC[CT]G[CT]T[GA][GA]GA[CT][CT][GA]A[CT]CATG[GA][CT]CA[CT]C[GA]	2.8E-994	256	26	Figure S3 (1)
2	[AT][CT][AC][TC][CT]A[CT]C[TC][AC]A[TC][CT]AAACA[CA]ACTCTTCTG	1.6E-676	274	28	Figure S3 (2)
3	AAA[GA]T[CT][ATC]GTTTAATTA[TA]C[AT][CT][CT]	1.8E-651	379	21	Figure S3 (3)	67	55	45	MA0194.1	Lim1-like	0.0028307	orf_497, 1128, 1375
4	[GA]A[CT]CAATCAGCTTGC[GA]A[GA]TTGT[CT]TTT	5.2E-500	149	26	Figure S3 (4)
5	AGCT[GA][CT][GA]CTATT[CT][CT][GA]TTTATAAAA[CT][GA][GA]	3.0E-428	139	27	Figure S3 (5)
6	GATTAAATAGAGGAGGTTGG[CT]TCCGGGCCAA	5.5E-410	57	31	Figure S3 (6)
7	C[CT]ATGAACCAAAGG[CT]	3.1E-270	208	15	Figure S3 (7)
8	GCAACATGTATC[GA]GCCCAACA	1.4E-251	62	21	Figure S3 (8)
9	[CT][AG][CT]TG[CT]TG[CT][GA]GT[TA]GCA[GA]CATA[CT][CT]TTTC[TC]GTTGTT[GA]TGAG[GA][GA]T[GA][CT]G[CT][GA]C[GA][AG]	2.2E-208	25	50	Figure S3 (9)
10	G[AT][TC][CG][GA]TAAA[TA]G[AG][CT]TG[CT]TGA[GA]TG[AT]GTTT[CT][AG]	9.7e-183	75	29	Figure S3 (10)
11	TATTAATTAAAGAT[TA]GAC[CT][CT][CT]TTATGACAGAC	1.9e-223	53	32	Figure S3 (11)	61	33	26	MA0194.1	Lim1-like	0.0105147	orf_497, 1128, 1375
12	CA[TC]G[GA]T[CA]G[GA][CT]GCT[CT]AG[CT][GA]C[GA]C	1.9e-163	64	21	Figure S3 (12)	3	7	3	M00361	CDC5	0.00260682	orf_34, orf_1482, orf_2912
13	GAG[TA]AACTGAAGTA[GA]TAA[AG]TAAA[TA]	1.7e-100	50	24	Figure S3 (13)
14	[AG][CT]TTTATTTAATGTTGA[CT]ATGA[GA][GA][GA]	9.4e-89	57	25	Figure S3 (14)
15	CACC[TA]A[TA][TC][TA]AACA[TC]G[CT][TC]CT[TA]C[CA]TGG[TC][GC][CA][GA]	5.1e-78	29	29	Figure S3 (15)
16	[TA][TA]TAAA[AT][AC]TC[TC]GG[TC]G[AG][GC]T[TA]ACC[TG][TC]C[CA]A[CT]C	3e-124	52	29	Figure S3 (16)
17	TTAAATA[TC]GTTTCTTCAAA	2.4e-66	56	19	Figure S3 (17)
18	TAACAA[CT]ATATAACTT[AT]T[CT]A[AT]T[AT][GAT]TAA[CT][GC]AAAA[GTA]	3.3e-97	48	34	Figure S3 (18)
19	TTA[GA]AAAATTAATTTT[CT][TA]G[CT][CT][GA]G[CT][GA]T[CT]A[AG]	4.9e-158	76	29	Figure S3 (19)	6	33	29	M01527	Sum1	0.0118182
20	C[CT]G[TC]AGTAG[TC][AG]TG[GA]AAGT[AG]TGATAAATAAATTT[AT]ATTT[AC]	2e-139	29	39	Figure S3 (20)
21	C[TC][GCT][GCA]GA[GA][GA][GA][GA][GAC][GA][TC]C[TC]CA[CA]GC[AT]A[GC][TC][TC][AC]T[GA][AC]CTTGCG[TG][GT][TA]T[AG][AC]	1.8e-97	27	41	Figure S3 (21)
22	[CT][CT]G[TC][AG]T[GC]G[CG]ATC[TG][CG][ACT][GTA][ATC][TC][GT]G[CA][CG][GT][TC]GTG[GA]G[AG][GTC][AGC][TG][CG][AGT]G[CA][CA][CGA][CA][GC]	5.8e-71	18	41	Figure S3 (22)
23	TTTTGC[TC]G[TA]TGACAA[TC]GAGGA[GA]G[CT]AGGA[GA]	6.3e-50	15	29	Figure S3 (23)
24	[AG][AG]TAAATAAA[CAG]A[CT][GA][TC]TTTTA[GA]	2.3e-48	158	21	Figure S3 (24)
25	[AG][GA]T[CT][CT][CT]A[GA][CT][GA][GA]A[CT][CT]AGAA[GA]A[GA]T[GA]T	2.3e-49	93	24	Figure S3 (25)
26	[CG][TA]GCC[GA][ATC][AC][AG][GTC][GT]C[CT]GT[CT]C[TC]G[CG][CT]GAT[AC]C[AG]GG	2.1e-40	15	29	Figure S3 (26)
27	AACATAAGG[GA][TG]T[AG]TTTATTTA	7.1e-56	39	21	Figure S3 (27)	10	22	2	M00289	HFH3	0.00748539	orf_1076, orf_1369, orf_3093
28	ATTCATTTCTT[GC]T[TA]GA[TC]CA[AG][TC]ATTTTT[CT][GA]	4.7e-40	25	29	Figure S3 (28)
29	C[GA]CAACA[GA]GGACTTCAGCA[GC]TATGC[TC][GA]AC	1e-31	10	29	Figure S3 (29)
30	GAATGGTGTGA[CT]GTAGTG	1.5e-27	21	18	Figure S3 (30)
31	A[AG]GCCTGC[CT]ATGCA[GA]GCAC[GA][TG][AG]CCG[CT][TC]T[TC]	1.1e-24	9	29	Figure S3 (31)
32	[GT][TC][GT]TT[GA][CT][GA]CGAGG[CT]GG[CT]GCACT[AG]ATTTCC	9.5e-38	10	29	Figure S3 (32)	6	12	1	M01057	ERF2	0.0300697
33	CTCAGCCGTTCA[CT]CC[CT]GGACATCC[GA]TTGG	8.4e-24	7	29	Figure S3 (33)
34	[GA]T[CT]GTCG[CT]T[AG][AT]TC[CT]AGCGATTTACAGCG[GA]	1.3e-18	9	29	Figure S3 (34)
35	AACACAC[CT]GTTATTAAAAGTAT[TC]GATG[GA]TAATTCCAA	1e-46	12	37	Figure S3 (35)
36	[GA]CG[CT]GGCTAAT[GA]TTGCCTGCCG[GT]TTTT[CT]C[GC]GCTTA[GA][AG]GTG[GAT]ACGGCCTCC	6.8e-37	7	50	Figure S3 (36)
37	A[CT]TT[CT]GA[TC][CT]TA[CT]GTC[CT]A[TC]GGTTC[GA]C[CT][GA]AACAAAA[TC]T[CT]AGGT	9.1e-37	8	41	Figure S3 (37)
38	TCACA[TC]TTCCTCACACAC[CA]AA	4.6e-17	15	21	Figure S3 (38)
39	[GA]CCAG[CT]GG[TG]CT[TC]AG[GA]C[CT]GGCCA[TC]TGTG[CT]C	2.6e-14	5	29	Figure S3 (39)
40	G[GA]TCGGC[AC]A[CT]A[ACG][AG][CA][CG]C[GAC][GC]AA[TG]A[CA]G[GA]GCAT[CT][GA]T[AG][TC][CA][CT][CG]C[GA]A[GC]	6.1e-26	7	41	Figure S3 (40)
