# Supplementary material for: The Genome of the Obligate Intracellular Parasite Trachipleistophora hominis: New Insights into Microsporidian Genome Dynamics and Reductive Evolution
Source: PLoS Pathog. 2012 Oct 25;8(10):e1002979. doi: 10.1371/journal.ppat.1002979 (PMC3486916; doi:10.1371/journal.ppat.1002979)
Supplement: Table S15 — Comparison of the transport proteins found in T. hominis and S. cerevisiae. (XLS) [file ppat.1002979.s031.xls]

## Sheet: T15
Supplementary Table 15: T. hominis has lost a large number of transport proteins in direct comparison to S. cerevisiae (TransporterDB). This table is split into three sections; i) homologues detected in both organisms, ii) only homologues in yeast but lost / highly diverged in T. hominis, iii) homologues found in T. hominis but not in yeast.
Number of proteins in S. cerevisiae	Number of proteins in T. hominis	short name	transporter family	transporter family description
proteins conserved in both species
5	1	MIT	1.A.35	The CorA Metal Ion Transporter (MIT) Family
3	1	Ctr	1.A.56	The Copper Transporter (Ctr) Family
4	1	MIP	1.A.8	The Major Intrinsic Protein (MIP) Family
85	8	MFS	2.A.1	The Major Facilitator Superfamily (MFS)
1	1	POT	2.A.17	The Proton-dependent Oligopeptide Transporter (POT) Family
7	2	AAAP	2.A.18	The Amino Acid/Auxin Permease (AAAP) Family
4	1	CaCA	2.A.19	The Ca2+:Cation Antiporter (CaCA) Family
2	2	CPA1	2.A.36	The Monovalent Cation:Proton Antiporter-1 (CPA1) Family
5	1	CDF	2.A.4	The Cation Diffusion Facilitator (CDF) Family
3	4	ZIP	2.A.5	The Zinc (Zn2+)-Iron (Fe2+) Permease (ZIP) Family
4	2	SulP	2.A.53	The Sulfate Permease (SulP) Family
9	3	DMT	2.A.7	The Drug/Metabolite Transporter (DMT) Superfamily
24	10	ABC	3.A.1	The ATP-binding Cassette (ABC) Superfamily
2	4	F-ATPase	3.A.2	The H+- or Na+-translocating F-type, V-type and A-type ATPase (F-ATPase) Superfamily
16	7	P-ATPase	3.A.3	The P-type ATPase (P-ATPase) Superfamily
1	1	AE	2.A.31	The Anion Exchanger (AE) Family
proteins only present in S. cerevisiae
2	0	VIC	1.A.1	The Voltage-gated Ion Channel (VIC) Superfamily
3	0	Amt	1.A.11	The Ammonia Transporter Channel (Amt) Family
1	0	NSCC2	1.A.15	The Non-selective Cation Channel-2 (NSCC2) Family
1	0	Mid1	1.A.16	The Yeast Stretch-Activated, Cation-Selective, Ca2+ Channel, Mid1 (Mid1) Family
1	0	TRP-CC	1.A.4	The Transient Receptor Potential Ca2+ Channel (TRP-CC) Family
1	0	TDT	2.A.16	The Telurite-resistance/Dicarboxylate Transporter (TDT) Family
1	0	PiT	2.A.20	The Inorganic Phosphate Transporter (PiT) Family
1	0	SSS	2.A.21	The Solute:Sodium Symporter (SSS) Family
1	0	BASS	2.A.28	The Bile Acid:Na+ Symporter (BASS) Family
34	0	MC	2.A.29	The Mitochondrial Carrier (MC) Family
24	0	APC	2.A.3	The Amino Acid-Polyamine-Organocation (APC) Family
1	0	CCC	2.A.30	The Cation-Chloride Cotransporter (CCC) Family
1	0	CPA2	2.A.37	The Monovalent Cation:Proton Antiporter-2 (CPA2) Family
2	0	Trk	2.A.38	The K+ Transporter (Trk) Family
10	0	NCS1	2.A.39	The Nucleobase:Cation Symporter-1 (NCS1) Family
1	0	LCT	2.A.43	The Lysosomal Cystine Transporter (LCT) Family
1	0	FNT	2.A.44	The Formate-Nitrite Transporter (FNT) Family
3	0	DASS	2.A.47	The Divalent Anion:Na+ Symporter (DASS) Family
1	0	ClC	2.A.49	The Chloride Carrier/Channel (ClC) Family
2	0	GUP	2.A.50	The Glycerol Uptake (GUP) Family
1	0	MTC	2.A.54	The Mitochondrial Tricarboxylate Carrier (MTC) Family
3	0	Nramp	2.A.55	The Metal Ion (Mn2+-iron) Transporter (Nramp) Family
1	0	ENT	2.A.57	The Equilibrative Nucleoside Transporter (ENT) Family
1	0	ACR3	2.A.59	The Arsenical Resistance-3 (ACR3) Family
1	0	RND	2.A.6	The Resistance-Nodulation-Cell Division (RND) Superfamily
3	0	MOP	2.A.66	The Multidrug/Oligosaccharidyl-lipid/Polysaccharide (MOP) Flippase Superfamily
3	0	OPT	2.A.67	The Oligopeptide Transporter (OPT) Family
4	0	AEC	2.A.69	The Auxin Efflux Carrier (AEC) Family
2	0	ThrE	2.A.79	The Threonine/Serine Exporter (ThrE) Family
1	0	Oxa1	2.A.9	The Cytochrome Oxidase Biogenesis (Oxa1) Family
1	0	ArsAB	3.A.4	The Arsenite-Antimonite (ArsAB) Efflux Family
9	0	IISP	3.A.5	The Type II (General) Secretory Pathway (IISP) Family
18	0	MPT	3.A.8	The Mitochondrial Protein Translocase (MPT) Family
1	0	FeT	9.A.9	The Low Affinity Fe2+ Transporter (FeT) Family
present only in T. hominis
0	7	MscS	1.A.23	The Small Conductance Mechanosensitive Ion Channel (MscS) Family
0	4	AAA	2.A.12	The ATP:ADP Antiporter (AAA) Family
0	2	GMA	2.A.7.13	The GDP-Mannose:GMP Antiporter (GMA) Family
0	1	CTL	2.A.92	The Choline Transporter-like (CTL) Family
0	1	MgtE	9.A.19	The Mg2+ Transporter-E (MgtE) Family
0	1	Hly III	9.B.30	The Hly III (Hly III) Family
